1 **TITLE: PLANT TRAITS ARE POOR PREDICTORS OF LONG-TERM ECOSYSTEM**  
2 **FUNCTIONING**

3  
4 **AUTHORS:** Fons van der Plas<sup>1,\*</sup>, Thomas Schröder-Georgi<sup>1,\*</sup>, Alexandra Weigelt<sup>1,2</sup>, Kathryn  
5 Barry<sup>1,2</sup>, Sebastian Meyer<sup>3</sup>, Adriana Alzate<sup>2</sup>, Romain L. Barnard<sup>4</sup>, Nina Buchmann<sup>5</sup>, Hans de  
6 Kroon<sup>6</sup>, Anne Ebeling<sup>7</sup>, Nico Eisenhauer<sup>2,8</sup>, Christof Engels<sup>9</sup>, Markus Fischer<sup>10</sup>, Gerd Gleixner<sup>11</sup>,  
7 Anke Hildebrandt<sup>2,12,13</sup>, Eva Koller-France<sup>19</sup>, Sophia Leimer<sup>14</sup>, Alexandru Milcu<sup>15,16</sup>, Liesje  
8 Mommer<sup>17</sup>, Pascal A. Niklaus<sup>18</sup>, Yvonne Oelmann<sup>19</sup>, Christiane Roscher<sup>2,20</sup>, Christoph  
9 Scherber<sup>21</sup>, Michael Scherer-Lorenzen<sup>22</sup>, Stefan Scheu<sup>23,24</sup>, Bernhard Schmid<sup>25,26</sup>, Ernst-Detlef  
10 Schulze<sup>11</sup>, Vicky Temperton<sup>27</sup>, Teja Tschardt<sup>28</sup>, Winfried Voigt<sup>7</sup>, Wolfgang Weisser<sup>3</sup>,  
11 Wolfgang Wilcke<sup>14</sup> & Christian Wirth<sup>1,2,11</sup>.

12  
13 **AUTHOR AFFILIATIONS**

14 <sup>1</sup>Systematic Botany and Functional Biodiversity, Life science, Leipzig University, Germany  
15 <sup>2</sup>German Centre for Integrative Biodiversity Research (iDiv) Halle-Jena-Leipzig, Germany  
16 <sup>3</sup>Terrestrial Ecology Research Group, School of Life Sciences Weihenstephan, Technical University of Munich,  
17 Germany  
18 <sup>4</sup>Agroécologie, AgroSup Dijon, INRA, Univ. Bourgogne, Univ. Bourgogne Franche-Comté, F-21000 Dijon, France  
19 <sup>5</sup>ETH Zurich, Switzerland  
20 <sup>6</sup>Department of Experimental Plant Ecology, Institute for Water and Wetland Research, Radboud University  
21 Nijmegen, The Netherlands  
22 <sup>7</sup>Institute of Ecology and Evolution, University Jena, Germany  
23 <sup>8</sup>Institute of Biology, Leipzig University, Germany  
24 <sup>9</sup>Humboldt-Universität zu Berlin  
25 <sup>10</sup>Institute of Plant Sciences, University of Bern, Switzerland  
26 <sup>11</sup>Max Planck Institute for Biogeochemistry, Jena, Germany  
27 <sup>12</sup>Helmholtz Centre for Environmental Research - UFZ, Germany  
28 <sup>13</sup>Friedrich-Schiller-University Jena, Germany  
29 <sup>14</sup>Institute of Geography and Geocology, Karlsruhe Institute of Technology (KIT), Karlsruhe, Germany  
30 <sup>15</sup>Ecotron Européen de Montpellier, Centre National de la Recherche Scientifique (CNRS), Montferrier-sur-  
31 Lez  
32 <sup>16</sup>Centre d'Ecologie Fonctionnelle et Evolutive, UMR 5175 (CNRS—Université de Montpellier—Université Paul-  
33 Valéry Montpellier—EPHE), Montpellier, France  
34 <sup>17</sup>Plant Ecology and Nature Conservation group, Wageningen University, PO box 47, 6700 AA Wageningen, The  
35 Netherlands  
36 <sup>18</sup>Department of Evolutionary Biology and Environmental Studies, University of Zurich, Switzerland  
37 <sup>19</sup>Geocology, University of Tübingen, Rümelinstr. 19-23, 72070 Tübingen, Germany  
38 <sup>20</sup>UFZ, Helmholtz Centre for Environmental Research, Department Physiological Diversity

39 <sup>21</sup>Institute of Landscape Ecology, University of Münster, Germany  
40 <sup>22</sup>Geobotany, Faculty of Biology, University of Freiburg, 79104 Freiburg, Germany  
41 <sup>23</sup>Centre of Biodiversity and Sustainable Land Use, University of Göttingen, Germany.  
42 <sup>24</sup>J.F. Blumenbach Institute of Zoology and Anthropology, Animal Ecology, University of Göttingen, Germany.  
43 <sup>25</sup>Department of Geography, University of Zurich, Winterthurerstrasse 190, CH-8057 Zurich, Switzerland  
44 <sup>26</sup>Institute of Ecology, College of Urban and Environmental Sciences, Peking University, 100871 Beijing, China  
45 <sup>27</sup>Leuphana University Lüneburg, Institute of Ecology, Universitätsallee 1, 21335 Lüneburg, Germany  
46 <sup>28</sup>Agroecology, Dept. of Crop Sciences, University of Göttingen, Grisebachstrasse 6, 37077 Göttingen  
47 \*These authors contributed equally

48

## 49 **ABSTRACT**

50 Earth is home to over 350,000 vascular plant species<sup>1</sup> that differ in their traits in  
51 innumerable ways. Yet, a handful of functional traits can help explaining major differences  
52 among species in photosynthetic rate, growth rate, reproductive output and other aspects of plant  
53 performance<sup>2-6</sup>. A key challenge, coined “the Holy Grail” in ecology, is to upscale this  
54 understanding in order to predict how natural or anthropogenically driven changes in the identity  
55 and diversity of co-occurring plant species drive the functioning of ecosystems<sup>7,8</sup>. Here, we  
56 analyze the extent to which 42 different ecosystem functions can be predicted by 41 plant traits  
57 in 78 experimentally manipulated grassland plots over 10 years. Despite the unprecedented  
58 number of traits analyzed, the average percentage of variation in ecosystem functioning that they  
59 jointly explained was only moderate (32.6%) within individual years, and even much lower  
60 (12.7%) across years. Most other studies linking ecosystem functioning to plant traits analyzed  
61 no more than six traits, and when including either only six random or the six most frequently  
62 studied traits in our analysis, the average percentage of explained variation in across-year  
63 ecosystem functioning dropped to 4.8%. Furthermore, different ecosystem functions were driven  
64 by different traits, with on average only 12.2% overlap in significant predictors. Thus, we did not  
65 find evidence for the existence of a small set of key traits able to explain variation in multiple  
66 ecosystem functions across years. Our results therefore suggest that there are strong limits in the

67 extent to which we can predict the long-term functional consequences of the ongoing, rapid  
68 changes in the composition and diversity of plant communities that humanity is currently facing.

69

## 70 **BODY**

71 Worldwide, ecological communities are rapidly changing due to various anthropogenic  
72 activities<sup>9-12</sup>. This biodiversity change is non-random, and the functional traits of organisms  
73 driving their growth, survival and reproduction are key in determining which species thrive and  
74 which perish under global change<sup>13-15</sup>. This may have important implications, as traits not only  
75 affect individual plant performance, but they may also drive various ecosystem functions such as  
76 biomass production, and the services these functions provide to human well-being<sup>7,8,15</sup>.

77 Predicting rates of ecosystem functioning, such as biomass production or carbon  
78 sequestration, from the composition or diversity of traits in plant communities has been coined  
79 the “Holy Grail” in ecology<sup>7,8</sup>. Various studies have shown links between plant traits and  
80 *species-level* variation in photosynthetic rate, growth, and reproductive output present in the  
81 plant kingdom<sup>3-5</sup>. However, in natural communities, plants occur in various abiotic  
82 environments, and they interact with individuals from other species, so that both the identity and  
83 diversity of traits may matter for *ecosystem-level* functioning. Despite this, so far various field  
84 studies only found relatively weak links between the identity and diversity of plant traits and  
85 ecosystem-level functioning<sup>8,16-18</sup>. Furthermore, those studies that did find strong links between  
86 traits and ecosystem functions<sup>19,20</sup> were typically carried out within a single year, but if links  
87 between traits and ecosystem functioning are highly context-dependent, the capacity of traits to  
88 predict the long-term consequences of global change, thereby attaining the “Holy Grail”, may  
89 still be limited. Alternatively, strong and consistent links between plant traits and ecosystem

90 functioning exist, but higher numbers and more appropriate traits than assessed in previous  
91 studies are needed to demonstrate those links.

92 To test these ideas, we first performed a systematic literature review to investigate which and  
93 how many traits 100 recent studies measured when attempting to link the diversity or  
94 composition of traits within terrestrial plant communities to ecosystem functioning. We found  
95 that most studies analyzed six traits, and only two studies assessed more than 15 traits (Fig. 1B).  
96 Nine of the ten most frequently studied traits (Fig. 1A) described aboveground plant properties,  
97 of which six described leaf properties. Only one frequently measured trait was related to plant  
98 roots, even though roots provide important plant functions (e.g. anchoring, resource uptake) and  
99 represent approximately 50% of total plant biomass<sup>21</sup>. Thus, most previous studies assessed a  
100 sparse set of traits, with a strong bias towards leaf traits.

101

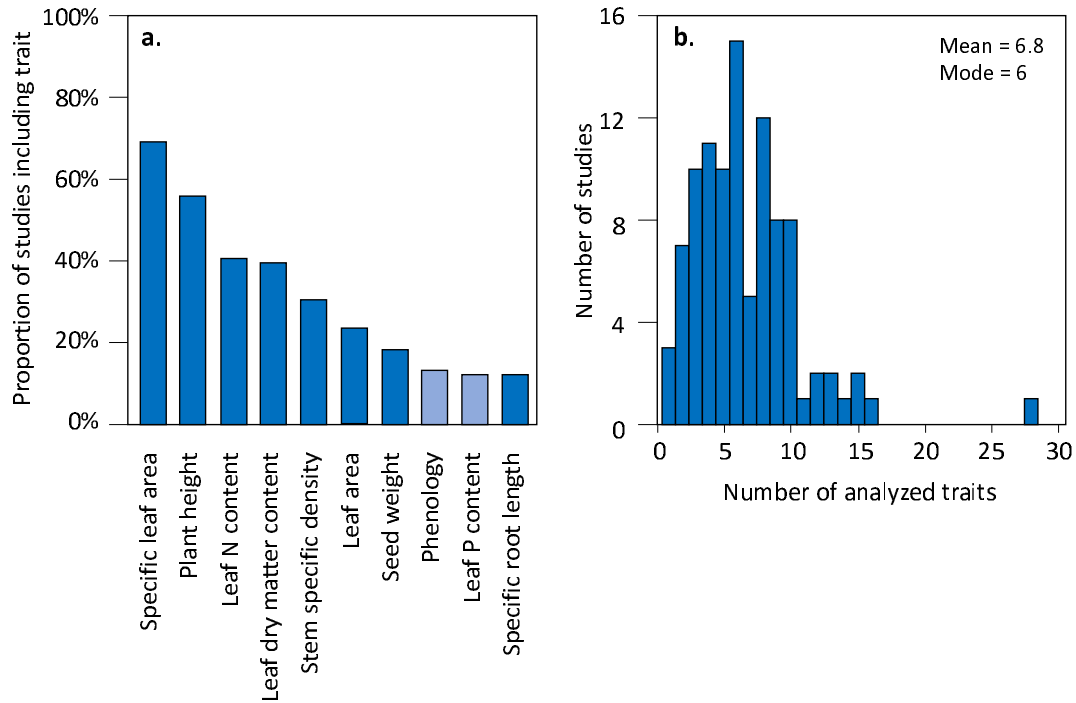

102

103 **Figure 1.** Overview of which and how many traits are typically analyzed in other ecosystem  
104 functioning-related studies. A: Percentage of studies in which the 10 most frequently measured traits  
105 were investigated, according to the review of 100 recently published articles. The lighter blue bar shows  
106 the only two functions not measured in this study. B: Number of measured traits among studies.

107

108 We then investigated to what extent a much higher number of traits can explain variation in  
109 ecosystem functioning. We did this using a dataset containing 10 years of measurements of 42  
110 ecosystem functions, assessed in 78 experimentally established grassland communities in  
111 Germany. The 42 ecosystem functions described various above- and belowground stocks and  
112 rates of plant, faunal, and abiotic properties driving grassland functioning (Supplementary  
113 Methods). Both the diversity and composition of the studied plant communities were  
114 experimentally manipulated, by sowing different combinations of species<sup>22,23</sup>. For each species,  
115 we measured 41 traits (more than any of the studies assessed in our review) related to structural,  
116 morphological, chemical and physiological properties of all main plant parts, including leaves,

117 stems, flowers, seeds, and roots. By combining these trait data with plant community data, we  
118 quantified both the Functional Identity and the Functional Diversity for each plot in each year.  
119 Functional Identity was calculated as the abundance-weighted mean of a trait within a  
120 community, and drives ecosystem functioning if the contributions of species to ecosystem  
121 functioning are proportional to their relative abundance<sup>15,24</sup>. Functional Diversity was calculated  
122 as Rao's Quadratic Entropy<sup>25</sup>, and can drive ecosystem functioning if species contribute  
123 differently to functioning when co-occurring with plants with different traits, e.g. due to trait-  
124 driven resource complementarity<sup>23,25,26</sup>.

125 We used linear mixed models to analyze how much of the variation of each of the 42  
126 ecosystem functions was explained by Functional Identity and Diversity metrics of all 41 traits,  
127 as well as by random year and plot differences. We used a forward model selection procedure, in  
128 which during each step a trait was added, if it significantly improved model fit and did not  
129 strongly correlate with the traits already present in the model. Despite the high number of traits  
130 included in our analysis, and even though each ecosystem function was on average driven by 4.8  
131 traits (Fig. 2B), the average marginal  $R^2$  of final models was 0.127, indicating that traits  
132 explained on average only 12.7% (ranging from 0.0% to 40.0%) of the variation in ecosystem  
133 functioning (Fig. 2C). Marginal  $R^2$  values were even lower (mean of 0.078) when we used a  
134 more conservative model selection procedure correcting for False Discovery Rates. Conditional  
135  $R^2$  values, which also account for the variance explained by random factors, including year  
136 differences, were much higher, with an average value of 0.632. Our finding that traits explained  
137 a very low proportion of variance may seem surprising, as other studies explained more variance  
138 with fewer predictors<sup>19</sup>. However, other studies typically used data for single years only, and it is  
139 possible that links between traits and ecosystem functions are only strong within years. To test

140 this, we also analyzed links between ecosystem functions and traits for each year separately. This  
 141 showed that within years marginal  $R^2$  values were much higher, with an average value of 0.326.  
 142 Thus, while traits were poorly linked to ecosystem functioning across years (possibly due to  
 143 strong shifts in species' abundances<sup>75</sup>), they explained much more variation within years,  
 144 indicating that links between traits and ecosystem functions are strongly context-dependent.

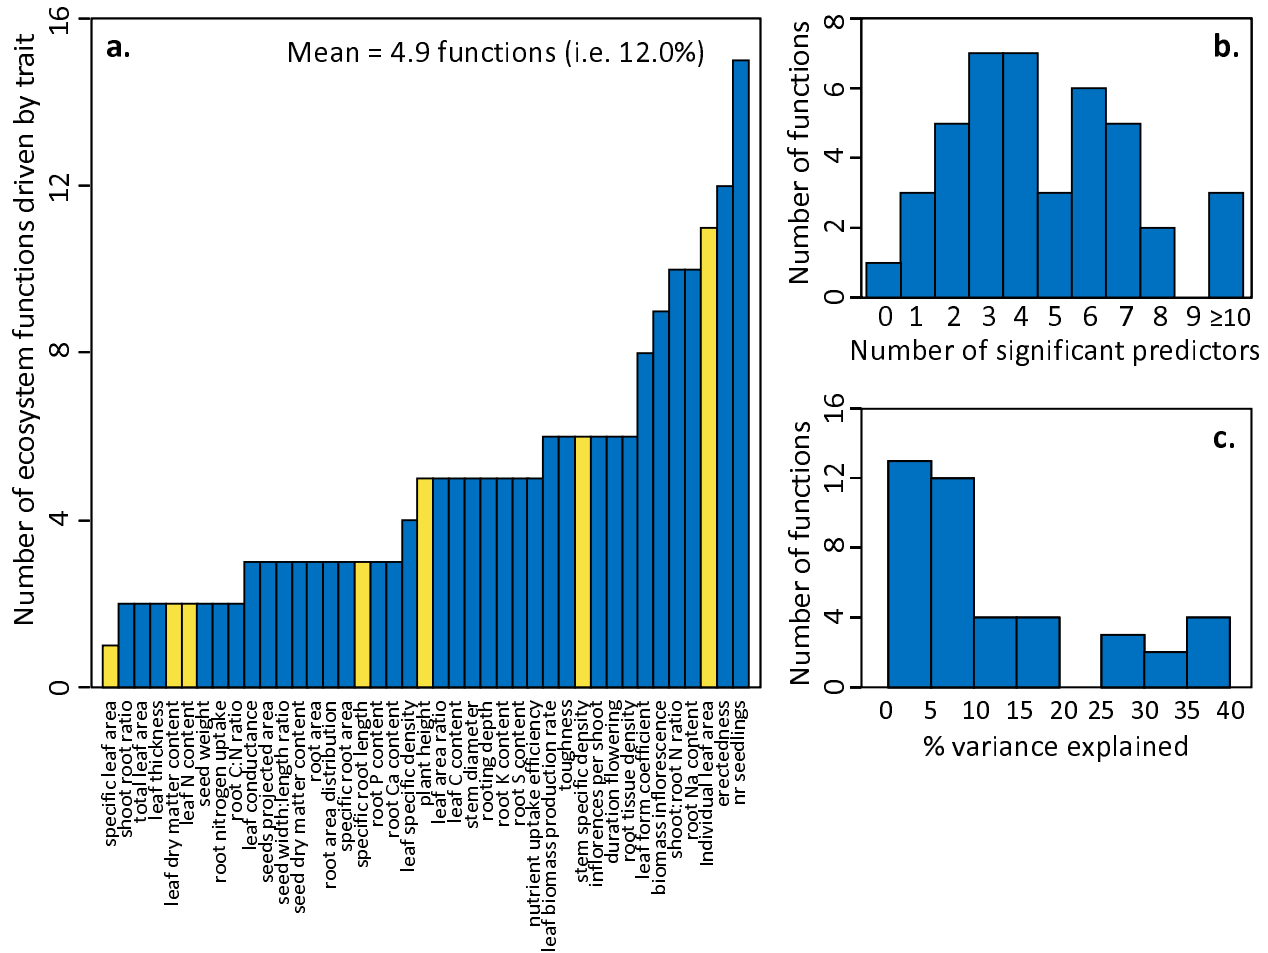

145  
 146 **Figure 2.** The relative importance of different and multiple traits for ecosystem functioning across years.  
 147 A: the number of analyzed functions that was significantly driven by each trait, according to final models.  
 148 The traits analyzed in over 10% of the papers included in the review are shown in yellow. B: Number of  
 149 significant predictors in final models of each ecosystem function. C: Marginal  $R^2$  values for final models  
 150 of each ecosystem function.

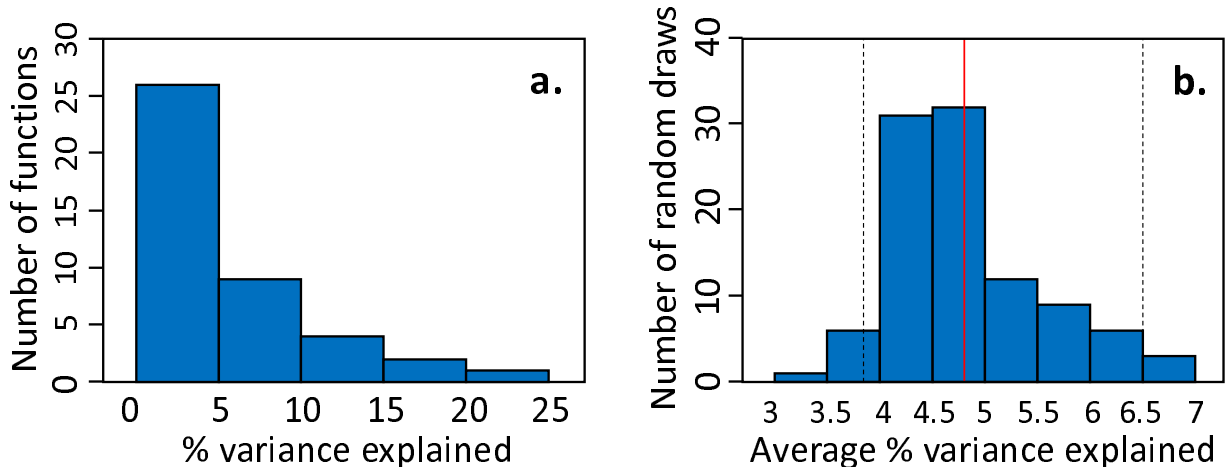

151  
152 **Figure 3.**  $R^2$  values of models in which only six traits were analyzed to explain ecosystem functions  
153 across years. A: Distribution of marginal  $R^2$  values of final models for each trait, when only the six most  
154 frequently investigated traits (see review) were included in the analysis. B: Distribution of mean marginal  
155  $R^2$  values (across final models for each trait), when based on 100 random draws, six randomly selected  
156 investigated traits were included in the analysis. The vertical dashed bars show the 95% confidence  
157 interval, while the vertical red bar shows the mean marginal  $R^2$  across all functions when only the six  
158 most frequently investigated traits were included in the analysis.

159  
160 We then assessed how our ability to explain rates of ecosystem functions across years  
161 depends on how many and which traits are included in analyses. Those traits most frequently  
162 assessed in other studies did not drive more functions than traits less frequently studied. One trait  
163 (specific leaf area) only significantly drove a single ecosystem function, while others (e.g. leaf  
164 area) drove many more, but an overall pattern was not detectable (Fig. 2A). We investigated  
165 more formally how our ability to explain variation in ecosystem functioning would change, if we  
166 had measured either *a*) a random subset of six (corresponding to the number of traits assessed in  
167 most other studies) out of the 41 traits (based on 100 random draws), or *b*) only the six traits  
168 most frequently assessed in other studies, or if *c*) we analysed species richness (the most



169 commonly used biodiversity indicator) instead as a predictor of ecosystem functioning.  
170 Irrespective of whether six random traits or those most frequently investigated in other studies  
171 were analysed, on average only 4.8% (95 percentile: 3.8-6.5%) of ecosystem functioning  
172 variation could be explained (Fig. 3A,B), while species richness could explain only 1.7% of  
173 variation in ecosystem functioning. This represents a strong decrease compared to the 12.7% of  
174 variation explained when all 41 traits were assessed (Fig. 2B). We also assessed to which extent  
175 analyzing subsets of fewer or more than six traits influenced the proportion of explained variance  
176 in ecosystem functioning. This showed that there was an asymptotic relationship between the  
177 number of traits analyzed and the average proportion of explained variation in ecosystem  
178 functioning, and that at least 9, or 24 traits are required to explain 5%, and 10% of the variation  
179 in ecosystem functioning, respectively (Fig. 4A).

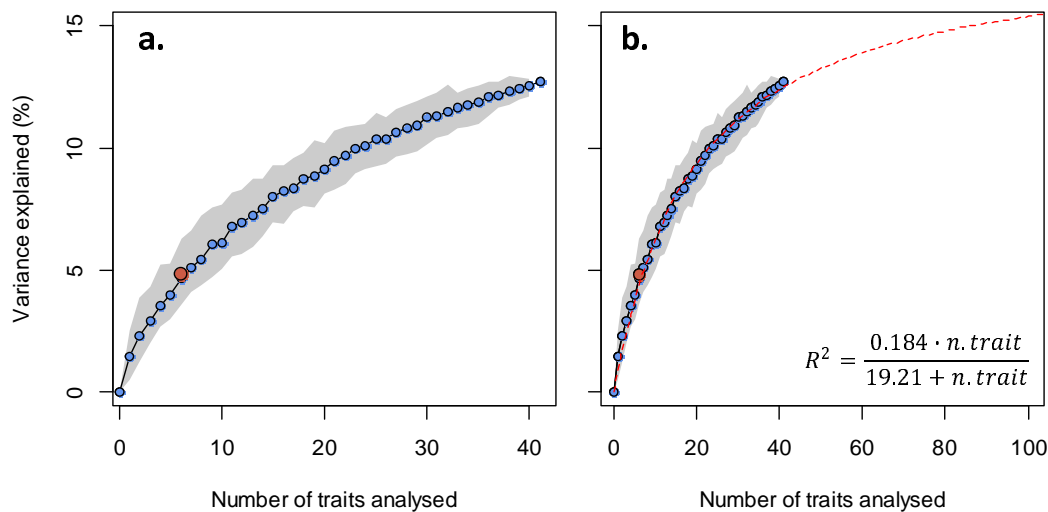

180  
181 **Figure 4.** The average proportion of variation in ecosystem functions across years explained by plant  
182 traits increases asymptotically with the number of traits included in the analysis. The red dot shows the  
183 proportion of explained variation when only the six traits most commonly assessed in other studies are  
184 included. A: the marginal  $R^2$  – number of traits relationship based on analysis of actual data. B: an

185 *additional extrapolated (based on a fitted Michaelis – Menten equation) marginal  $R^2$  – number of traits*  
186 *relationship (red, dashed line).*

187

188 Thus, while each ecosystem function alone was on average explained by fewer than 5 traits  
189 (Fig. 2B), many more traits are needed to explain multiple ecosystem functions (Fig. 4). While  
190 seemingly a paradox, this happens if different ecosystem functions are driven by different traits.  
191 We demonstrated this by calculating the overlap ( $o$ ) in the traits significantly driving each pair of  
192 ecosystem functions, using Sørensen's index<sup>27</sup>. The average overlap indicated that pairs of  
193 ecosystem functions had on average only 12.2% significant trait drivers in common. Thus, while  
194 traits are commonly advertised as conveying more general information than a species' identity  
195 does<sup>7,14,26</sup>, a small set of key traits able to explain variation in multiple ecosystem functions does  
196 not exist in Central European grasslands, just like 'superspecies' providing multiple functions  
197 don't exist<sup>28</sup>.

198 While many ecosystem functions were relatively poorly explained by traits, we could  
199 nevertheless identify traits that predicted many ecosystem functions, and ecosystem functions  
200 that were better predicted by traits than others. All traits explained at least one ecosystem  
201 function, and some (e.g. leaf area) drove many more (Fig. 2A). We also found that ecosystem  
202 functions related to aboveground stocks or processes were much better predicted (average  
203 marginal  $R^2 = 0.21$ ) than those related to belowground stocks or processes (average marginal  $R^2$   
204 = 0.07) (Table S2.1), even though 14 root traits were included in our analysis. It is possible that  
205 unmeasured traits related to litter quality or mycorrhizal associations have stronger links to  
206 functions such as soil respiration or soil nutrient availability. However, extrapolation of the  
207 observed relationships between model  $R^2$  and the number of analysed traits suggests that 87 traits  
208 are needed to increase the proportion of variance explained to 15%, and that there is an upper

209 limit of around 18% in the proportion of variance explained, even if an unlimited number of  
210 traits is analyzed (Fig. 4B). Hence, the inclusion of more trait data would only yield limited gains  
211 in our ability to explain ecosystem functioning. Instead, it is possible that the inclusion of  
212 intraspecific variation (not considered in this study) would improve links with ecosystem  
213 functions<sup>29</sup>. In addition, there were small spatial mismatches between within-plot locations of  
214 ecosystem function measurements and vegetation surveys, which could have weakened links  
215 between traits and ecosystem functioning. Lastly, it is possible that traits are more strongly  
216 linked to ecosystem functioning within other systems such as forests, or across ecosystem types.

217 Using one of the most comprehensive studies so far, we showed that while traits can be  
218 strongly linked to ecosystem functions within years, our capacity to predict levels of multiple  
219 ecosystem functions across years (differing in e.g. weather conditions) is strongly limited. Thus,  
220 finding ecology's Holy Grail is extremely challenging at best, and at worst a 'mission  
221 impossible'. This may have strong implications. The functional composition and diversity of  
222 plant communities are rapidly changing<sup>9-12</sup>, and researchers are employing increasingly complex  
223 models to predict the consequences of these changes for worldwide biogeochemical and  
224 hydrological cycles<sup>30,31</sup>. While we encourage the use of such models and their inclusion of  
225 increasingly accurate trait information, our work also raises concerns about limits in their  
226 predictive capacity, suggesting that the consequences of ongoing biodiversity change are largely  
227 unpredictable. Human well-being relies on ecosystem services that are underpinned by various  
228 ecosystem functions<sup>32,33</sup>, and insuring that these functions are provided at high levels is  
229 extremely challenging if future environments are dominated by plant communities differing from  
230 those observed today. Hence, policies halting the current-day, rapid changes in biodiversity are  
231 the safest bet to guarantee nature's contributions to future generations of people.

232

233 **ACKNOWLEDGEMENTS**

234 We thank Enrica de Luca, Anja Vogel, Helmut Hillebrand and Elisabeth Marquard for their  
235 contributions to the data collection. The Jena Experiment is funded by the German Science  
236 Foundation (DFG Oe516/3-1, 3-2, 10-1).

237

238 **AUTHOR CONTRIBUTIONS**

239 F.v.d.P., T.S-G., A.W., K.B. and C.W. conceived the ideas and designed the study. F.v.d.P., T.S-  
240 G., S.M. and A.A. performed the analyses. All authors, except for F.v.d.P., K.B. and A.A.,  
241 contributed to the data collection. F.v.d.P wrote a first draft of the paper, and all other authors  
242 contributed to editing several manuscript versions.

243

244 **COMPETING INTERESTS**

245 The authors declare no competing interests for this study.

246

247 **METHODS**

248 *Review*

249         We performed a review to investigate which traits were most often analyzed as predictors  
250 of ecosystem functioning in recent years. We did this on the Clarivate Analytics Web of Science  
251 website in July 2018, using the search terms (functional-diversity *or* community-weighted-mean  
252 *or* CWM *or* trait-diversit\*) *and* ecosystem function\* *and* (plant *or* vegetation). This initially  
253 yielded 654 results. Among these, we searched for papers that analyzed an ecosystem function  
254 (broadly defined as energy or trophic fluxes and biomass stocks, measured at the ecosystem or  
255 community level) as the response of the Functional Diversity or Functional Identity (e.g.  
256 (abundance-weighted) trait mean values) of one or more terrestrial plant traits. We only focused  
257 on the 100 most recently published articles that met these criteria. The main objective of this  
258 mini-review was to get an overview of a representative sample of recent studies linking  
259 terrestrial plant traits to ecosystem functioning, rather than to get an exhaustive overview of all  
260 published literature.

261         Among the 100 selected papers (see Appendix A), we screened which plant traits were  
262 analyzed as predictors of ecosystem functioning. Some traits had different labels among different  
263 publications (e.g. specific leaf area versus leaf mass per area<sup>34,35</sup>). In those cases, we used our  
264 expert judgement and a plant trait thesaurus (<http://www.top-thesaurus.org/home>)<sup>36</sup> to relabel  
265 traits in order to obtain a common terminology. We then counted and ranked the frequencies  
266 (number of papers) by which each trait was analyzed as a predictor of ecosystem functioning,  
267 and we identified the top ten of traits analyzed in most papers, and the five most commonly  
268 analyzed traits.

269

270 *Experimental design*

271 We studied relationships between various ecosystem functions and plant traits using data  
272 from the Jena Main Biodiversity Experiment<sup>22,23</sup>, which is one of the biggest and longest running  
273 biodiversity experiments worldwide. This grassland biodiversity experiment was set up in spring  
274 2002 in the floodplain of the Saale river close to the city of Jena (Germany, 50°55`N, 11°35`E,  
275 130 m a.s.l.), at a field that was previously managed as a fertilized agricultural field for at least  
276 four decades. The experiment was designed to study the effects of species and functional group  
277 richness on various ecosystem functions.

278 In short, 78 plots were established, each measuring 20×20 m. In these plots, different  
279 subsets of a species pool of 60 species were sown in spring 2002. The different species were  
280 selected to be representative of a Molinio-Arrhenatheretea grasslands<sup>37</sup> and were classified in  
281 four functional groups as ‘grass’ (including Poaceae and one Juncaceae species), small herb, tall  
282 herb or legume, with 16, 12, 20 and 12 species in the species pool, respectively. In each plot, 1,  
283 2, 4, 8 or 16 species were sown, with each richness level replicated 16 times. The 16 species  
284 mixture plots formed an exception, and were replicated only 14 times. Total sowing density was  
285 1000 seeds per m<sup>2</sup>, irrespective of the richness level. Each plot contained a unique species  
286 composition. In addition to a species richness gradient, a functional group richness gradient was  
287 established, in such a way that sown species and functional group richness were as orthogonal as  
288 possible. Functional group richness ranged from 1, 2, 3 and 4, with 34, 20, 12 and 12 replicates,  
289 respectively. Plots were assigned to four blocks in parallel to the riverside to account for  
290 differences in soil properties with increasing distance from the river (with e.g. sand content being  
291 higher in plots closer to the Saale river). Each block had a similar number of plots, and each  
292 block had all levels of species and functional group richness approximately equally represented.

293 Twice per growing season, plots were weeded in order to avoid species that were not  
294 sown in the plots upon establishment. We refer to two other publications<sup>22,23</sup> for more details on  
295 the design of the Jena main experiment.

296

### 297 *Plant community assessments*

298 During the period between 2003 and 2012, twice per year, during spring (May) and  
299 summer (August), cover of all target plant species was estimated in each plot, within a 3×3 m  
300 subplot. For more details, we refer to Roscher et al. (2013)<sup>38</sup>.

301

### 302 *Ecosystem function measurements*

303 During the years 2002 till 2012, 42 different ecosystem variables (‘ecosystem functions’  
304 hereafter) were measured, describing plant, faunal and abiotic pools and process rates, some of  
305 which were measured aboveground, and some of which were measured belowground. Some  
306 ecosystem functions were measured in multiple seasons or years, always using standardized  
307 protocols. The ecosystem functions measured were: plant biomass consumed by herbivores,  
308 herbivory rate, frequency of pollinator visits, abundance of soil surface fauna, richness of soil  
309 surface fauna, abundance of vegetation layer fauna, richness of vegetation layer fauna, number of  
310 pollinator species, drought resilience, drought resistance, leaf area index, bare ground cover,  
311 aboveground plant biomass, dead plant biomass, cover of invasive plant species, richness of  
312 invasive plant species, rain throughfall, basal soil respiration, soil respiratory quotient,  
313 earthworm biomass, soil larvae abundance, soil mesofauna abundance, soil macrofauna  
314 abundance, biomass of soil microbes, biomass of plant roots, downward flux water in upper soil,  
315 downward flux water in deeper soil, upward flux water in upper soil, upward flux water in

316 deeper soil, evapotranspiration in upper soil, evapotranspiration in deeper soil, upper soil water  
317 content, deep soil water content, inorganic carbon content, organic carbon content, soil bulk  
318 density, soil nitrogen content, soil  $\delta^{15}\text{N}$  values, soil  $\text{NH}_4$  content, soil  $\text{NO}_3$  content, nitrate  
319 leaching and soil phosphorus content (see Table S1.1 for a more detailed overview). When  
320 ecosystem functions were measured multiple times within a year (e.g. both in spring and  
321 summer) within the same plot, we used averages of those repeated measurements in further  
322 analyses. For detailed descriptions on the methodology of all ecosystem function measurements,  
323 we refer to the Supplementary Materials.

324

### 325 *Trait measurements*

326 In total, 41 plant traits were measured. These traits described whole plant, leaf, stem,  
327 flower, seed, (fine) root characteristics, and were structural, morphological, chemical,  
328 physiological, phenological. The measured traits included all terrestrial plant traits identified as  
329 ‘most commonly assessed’ in our mini-review, except for leaf phosphorus content. For a  
330 complete overview of all measured traits, we refer to Table S1.2. The majority of the traits,  
331 including most leaf and root traits, were measured in mesocosms filled with Jena field soil mixed  
332 with sand in the Botanical Garden of Leipzig (Saxony, Germany), in 2011 and 2012. Mass  
333 fraction and number of inflorescences and seedling density were measured in monocultures at  
334 the Jena Experiment. Rooting depth and flower duration could not be reliably estimated in the 80  
335 cm high mesocosms and was therefore derived from earlier published measurements<sup>20</sup>. Detailed  
336 information on the individual trait measurements is provided in Supplementary Material.

337

### 338 *Quantifying Functional Diversity and Functional Identity*



339 We combined the species-level abundance assessments for each plot with the trait  
340 measurements to quantify Functional Diversity and Identity in each plot, separately for each  
341 combination of year and season. Functional Diversity was calculated for each trait (thus yielding  
342 42 Functional Diversity measures in total) separately using Rao's Quadratic Entropy metric<sup>24</sup> (or  
343 Q), which measures the sum of pairwise trait distances of co-occurring species, whereby  
344 pairwise distances are weighted by the relative abundance of the species:  
345  $Q = \sum_{i=1}^{S-1} \sum_{j=i+1}^S d_{ij} p_i p_j$ , where  $i$  and  $j$  are the two species forming a species pair,  $S$  is the  
346 species richness within a community,  $d_{ij}$  is the Euclidean trait distance and  $p_i$  and  $p_j$  are the  
347 relative abundance of species  $i$  and  $j$ , respectively. Here, relative abundances are measured as the  
348 species' cover (estimated in subplots of 3 x 3 m, see above) within a plot divided by the total  
349 community cover. Functional Identity was measured for each trait (thus also yielding 41  
350 measures in total) using the Community Weighted Mean (CWM) metric<sup>15</sup>, which measures the  
351 abundance-weighted average of trait values among species within a community as:  $CWM =$   
352  $\sum_{i=1}^S p_i T_i$ , where  $T_i$  indicates the trait value of species  $i$ . We also recalculated FD and CWMs  
353 based on presence-absence data (thus ignoring differences in relative abundance of species  
354 present in a plot) for sensitivity analyses.

355 In addition to calculating CWM and FD values, we also calculated the realized species  
356 richness for each plot and each year, based on the species-level abundance assessments.

357

### 358 *Statistical analyses*

359 We first analyzed how each ecosystem function was related to all 41 measured traits.  
360 This was done using a separate Linear Mixed Model (LMM) for each function, in which the  
361 CWM and Rao's Q values for each trait were treated as fixed factors (thus yielding  $2 \times 41 = 82$

362 fixed factors), and year and plot were treated as random factors. We used a forward model  
363 selection procedure, in which first ‘empty’ models only containing random factors were fitted,  
364 and then significant fixed factors were added step-by-step. We chose a forward model selection  
365 procedure to overcome problems related to multicollinearity (many traits, and hence FD and FI  
366 metrics, were correlated, see Table S2.2). During each step in our selection procedure, we first  
367 tested for the significance of all  $n$  fixed factors (where  $n$  = the total number of 82 fixed factors  
368 minus the number of fixed factors already included at earlier steps of the model selection  
369 procedure) that could be added to the previous, less complex model, using log-likelihood tests.  
370 We then investigated which factor was most significant, and added this factor to the previous  
371 model if it did not lead to any Variance Inflation Factor (VIF) exceeding 5. In case the most  
372 significant fixed factor did cause multicollinearity (maximum VIF > 5), we investigated if the  
373 next-most significant factor could be added. This procedure was repeated until we ended up with  
374 a model only containing significant fixed factors with VIF values  $\leq 5$ , to which no significant ( $P$   
375  $\leq 0.05$ ) fixed factors could be added. LMM fitting was done using a Restricted Maximum  
376 Likelihood procedure, using the lmer function of the lme4 package<sup>39</sup> in R-3.5.1<sup>40</sup>. We calculated  
377 the marginal (proportion of variance exclusively explained by fixed factors, i.e. traits) and  
378 conditional (proportion of variance explained by fixed factors and random factors combined)  $R^2$   
379 values<sup>41</sup> using the r.squaredGLMM function of the MuMIn package<sup>42</sup> in R-3.5.1<sup>40</sup>. We also  
380 performed some sensitivity analyses, in which we repeated the above analyses, with *i*) as the  
381 only difference that we corrected for False Discovery Rates<sup>43</sup>, to reduce the risk of type I errors,  
382 *ii*) as the only difference that FD and CWM values based on presence-absence data were used as  
383 predictors and *iii*) where we replaced FD and CWM predictor variables by realized species  
384 richness.

385 We also investigated to which extent links between the Functional Diversity and Identity  
386 of traits and ecosystem functions changed, if we analysed ecosystem functions for each year in  
387 which they were measured separately. We did this by running the same models and model  
388 selection procedure as described above, except that the random factor ‘year’ was omitted from  
389 the models (as functions were analyzed for each year separately, this random factor had become  
390 obsolete). In addition, the random factor ‘plot’ was omitted from the models, as we only had one  
391 measurement per plot within each year.

392 To quantify the overlap in significant predictors among different ecosystem functions, we  
393 created a 42 (number of ecosystem functions)  $\times$  41 (number of traits) binary matrix, with cells  
394 containing values of 1 when either the FD and/or the FI of the corresponding trait significantly  
395 drove the ecosystem function, and a value of 0 when neither the FD nor the FI significantly  
396 drove the ecosystem function. We then calculated the overlap ( $o$ ) in the sets of traits significantly  
397 driving each pair of ecosystem functions, using Sørensen’s index<sup>28</sup> as:  $o = \frac{|T_i \cap T_j|}{0.5(|T_i| + |T_j|)}$  where  
398  $|T_i|$  and  $|T_j|$  are the numbers of traits significantly driving respectively ecosystem function  $i$  and  
399  $j$ , and  $|T_i \cap T_j|$  is the number of traits significantly driving both ecosystem function  $i$  and  $j$  and  
400 we then calculated the average overlap. Importantly, these overlap estimates could be  
401 conservative (i.e. underestimated) due to strong correlations between traits. Therefore, we  
402 repeated the above described linear mixed models (originally with 82 fixed factors,  
403 corresponding to the FD and FI values of 41 traits), but then using Principal Component Analysis  
404 (PCA) axis values based on the FD and FI values as explanatory variables. To this end, we first  
405 performed a PCA, and we selected the 13 PCA axes that explained more than 100/82 (the  
406 number of input variables) = 1.22% of all FD and FI variation. Together, these 13 PCA axes  
407 explained 92% of all FD and FI variation. The selection procedure of models linking ecosystem

408 functions with PCA axes was the same as for the main analyses linking ecosystem functions with  
409 FD and FI variables. We then repeated the overlap analysis in the same way as described above,  
410 and found that for FD and FI metrics based on PCA variables, the average overlap of 25.7% was  
411 somewhat, but not much, higher than the overlap based on FD and FI metrics of raw traits.

412 We then analyzed to what extent a subset of the six traits most commonly assessed in  
413 other studies, i.e. specific leaf area, plant height, leaf N concentration, leaf dry matter content,  
414 stem tissue density and leaf area, could explain variance in ecosystem functioning. To this end,  
415 we repeated the modeling procedure described above, except that only the above mentioned six  
416 traits were assessed in the model selection procedure, rather than the full set of 41 traits. In  
417 addition, we also assessed how random subsets of  $n$  traits, with  $n$  ranging from 1 to 40, could  
418 explain ecosystem functioning. To this end, we ran 100 simulations for each level of  $n$ . In each  
419 of these simulations, we first randomly selected a subset of  $n$  traits out of the total of 41 traits.  
420 For these random subsets of  $n$  traits, we again ran the same model selection procedure as  
421 described above for each ecosystem function, to assess which of the traits significantly drove the  
422 levels of each function, and in order to assess the marginal  $R^2$  values of final models. For each  
423 simulation, we then calculated the mean (across all functions) marginal  $R^2$  value, and for each  $n$ ,  
424 we calculated the mode and 95% percentiles for the mean marginal  $R^2$  value across the 100  
425 simulations (as reported in Fig. 4). Only for  $n = 1$  and  $n = 40$  traits this procedure was slightly  
426 different, as for both of these levels of  $n$ , there were only 41 traits or trait combinations possible.  
427 Thus, in those cases, we did not take 100 random draws of traits, but instead systematically  
428 analysed at all possible combinations. Based on the resulting relationship between the number of  
429 traits analyzed and the marginal  $R^2$  values, we fitted a non-linear model using the nls function in  
430 R3.5.3, of the form:  $R^2 = \frac{R_{max}^2 \cdot n \cdot trait}{K + n \cdot trait}$  in which  $R^2$  is the marginal  $R^2$  value,  $R_{max}^2$  is the

431 asymptote in marginal  $R^2$  value,  $n_{\text{trait}}$  the number of traits analysed, and  $K$  describes the slope  
432 by which the  $R_{\text{max}}^2$  is reached. The resulting  $R_{\text{max}}^2$  and  $K$  values were 0.184 and 19.21  
433 respectively, and these were used to extrapolate the observed relationship between the number of  
434 traits analyzed and the marginal  $R^2$  values, in order to calculate how many traits were required to  
435 obtain marginal  $R^2$  values of 0.150 and higher.  
436

437 **REFERENCES**

- 438 1. The Plant List (2010). Version 1. URL: <http://www.theplantlist.org/> [accessed 3 April  
439 2019]
- 440 2. Westoby, M., Falster, D. S., Moles, A. T., Vesk, P. A. & Wright, I. J. (2002). Plant  
441 ecological strategies: some leading dimensions of variation between species. *Annual*  
442 *Reviews in Ecology and Systematics* 33, 125-159.
- 443 3. Wright, I. J., Reich, P. B., Westoby, M., Ackerly, D. D., Baruch, Z., Bongers, F.,  
444 Cavender-Bares, J., Chapin, T., Cornelissen, J. H. C., Diemer, M., Flexas, J., Garnier, E.,  
445 Groom, P. K., Gulias, J., Hikosaka, K., Lamont, B. B., Lee, T., Lee, W., Lusk, C.,  
446 Midgley, J. J., Navas, M.-L., Niinemets, Ü., Oleksin, J., Osada, N., Poorter, H., Poot, P.,  
447 Prior, L., Pyankov, V. I., Roumet, C., Thomas, S. C., Tjoelker, M. G., Veneklaas, E. J. &  
448 Villar, R. (2004). The worldwide leaf economics spectrum. *Nature* 428, 821-827.
- 449 4. Moles, A. T. & Westoby, M. (2006). Seed size and plant strategy across the whole life  
450 cycle. *Oikos* 113, 91-105.
- 451 5. Reich, P. B. (2014). The world-wide ‘fast-slow’ plant economics spectrum: a traits  
452 manifesto. *Journal of Ecology* 102, 275-301.
- 453 6. Schroeder-Georgi T., Wirth, C., Nadrowski, K., Meyer, S. T., Mommer, L. & Weigelt, A.  
454 (2016). From pots to plots: hierarchical trait-based prediction of plant performance in a  
455 mesic grassland. *Journal of Ecology* 104, 206-218.
- 456 7. Lavorel, S. & Garnier, E. (2002). Predicting changes in community composition and  
457 ecosystem functioning from plant traits: revisiting the Holy Grail. *Functional Ecology* 16,  
458 545-556.

- 459 8. Funk, J. L., Larson, J. E., Ames, G. M., Butterfield, B. J., Cavender-Bares, J., Firn, J.,  
460 Laughlin, D. C., Sutton-Grier, A. E., Williams, L. & Wright, J. (2017). Revisiting the  
461 Holy Grail: using plant functional traits to understand ecological processes. *Biological*  
462 *Reviews* 92, 1156-1173.
- 463 9. Vellend, M., Baeten, L., Myers-Smith, I. H., Elmendorf, S. C., Beauséjour, R., Brown, C.  
464 D., De Frenne, P., Verheyen, K. & Wipf, S. (2013). Global meta-analysis reveals no net  
465 change in local-scale plant diversity over time. *Proceedings of the National Academy of*  
466 *Sciences of the United States of America* 110, 19456-19459.
- 467 10. Dornelas, M., Gotelli, N. J., McGill, B., Shimadzu, H., Moyes, F., Sievers, C. &  
468 Magurran, A. E. (2014). Assemblage time series reveal biodiversity change but no  
469 systematic loss. *Science* 344, 296-299.
- 470 11. Newbold, T., Hudson, L. N., Hill, S. L. L., Contu, S., Lysenko, I., Senior, R. A., Börger,  
471 L., Bennett, D. J., Choimes, A., Collen, B., Day, J., De Palma, A., Díaz, S., Echeverria-  
472 Londoño, S., Edgar, M. J., Feldman, A., Garon, M., Harrison, M. L. K., Alhusseini, T.,  
473 Ingram, D. J., Itescu, Y., Kattge, J., Kemp, V., Kirkpatrick, L., Kleyer, M., Laginha Pinto  
474 Correia, D., Martin, C. D., Meiri, S., Novosolov, M., Pan, Y., Phillips, H. R. P., Purves,  
475 D. W., Robinson, A., Simpson, J., Tuck, S. L., Weiher, E., White, H. J., Ewers, R. M.,  
476 Mace, G. M., Scharlemann, J. P. W. & Purvis, A. (2015). Global effects of land use on  
477 local terrestrial biodiversity. *Nature* 520, 45-50.
- 478 12. McGill, B. J., Dornelas, M., Gotelli, N. J. & Magurran, A. E. (2015). Fifteen forms of  
479 biodiversity trend in the Anthropocene. *Trends in Ecology & Evolution* 30, 104-113.

- 480 13. McKinney, M. L. & Lockwood, J. L. (1999). Biotic homogenization: a few winners  
481 replacing many losers in the next mass extinction. *Trends in Ecology & Evolution* 14,  
482 450-453.
- 483 14. McGill, B. J., Enquist, B. J., Weiher, E. & Westoby, M. (2006). Rebuilding community  
484 ecology from functional traits. *Trends in Ecology and Evolution* 21, 178-185.
- 485 15. Violle, C., Navas, M.-L., Vile, D., Kazakou, E., Fortunel, C., Hummel, I. & Garnier, E.  
486 (2007). Let the concept of trait be functional! *Oikos* 116, 882-892.
- 487 16. Paine, C. E. T., Amissah, L., Auge, H., Baraloto, C., Barrufol, M. *et al.* (2015). Globally,  
488 functional traits are weak predictors of juvenile tree growth, and we do not know why.  
489 *Journal of Ecology* 103, 978-989.
- 490 17. Yang, J., Cao, M. & Swenson, N. G. (2018). Why functional traits do not predict tree  
491 demographic rates. *Trends in Ecology and Evolution* 33, 326-336.
- 492 18. Huang, Y., Chen, Y., Castro-Izaguirre, N., Baruffol, M., Brezzi, M. *et al.* (2018). Impacts  
493 of species richness on productivity in a large-scale subtropical forest experiment. *Science*  
494 362, 80-83.
- 495 19. Díaz, S., Lavorel, S., de Bello, F., Quétier, F., Grigulis, K. & Robson, T. M. (2007).  
496 Incorporating plant functional diversity effects in ecosystem service assessments.  
497 *Proceedings of the National Academy of Sciences of the United States of America* 104,  
498 20684-20689.
- 499 20. Tilman, D., Knops, J., Wedin, D., Reich, P., Ritchie, M. & Siemann, E. (1997). The  
500 influence of functional diversity and composition on ecosystem processes. *Science* 277,  
501 1300-1302.



- 502 21. Poorter, H., Niklas, K. J., Reich, P. B., Oleksyn, J., Poot, P. & Mommer, L. (2012).  
503 Biomass allocation to leaves, stems and roots: meta-analyses of interspecific variation  
504 and environmental control. *New Phytologist* 193, 30-50.
- 505 22. Roscher, C., Schumacher, J., Baade, J., Wilcke, W., Gleixner, G., Weisser, W. W.,  
506 Schmid, B. & Schulze, E.-D. (2004). The role of biodiversity for element cycling and  
507 trophic interactions: an experimental approach in a grassland community. *Basic and*  
508 *Applied Ecology* 5, 107-121.
- 509 23. Weisser, W. W., Roscher, C., Meyer, S., Ebeling, A., Luo, G., Allan, E., Beßler, H.,  
510 Barnard, R., Buchmann, N., Buscot, F., Engels, C., Fischer, C., Fischer, M., Gessler, A.,  
511 Gleixner, G., Halle, S., Hildebrandt, A., Hillebrand, H., de Kroon, H., Lange, M., Leimer,  
512 S., Le Roux, X., Milcu, A., Mommer, L., Niklaus, P., Oelmann, Y., Proulx, R., Roy, J.,  
513 Scherber, C., Scherer-Lorenzen, M., Scheu, S., Tschardtke, T., Wachendorf, M., Wagg,  
514 C., Weigelt, A., Wilcke, W., Wirth, C., Schulze, E.-D., Schmid, B. & Eisenhauer, N.  
515 (2017) Biodiversity effects on ecosystem functioning in a 15-year grassland experiment:  
516 patterns, mechanisms, and open questions. *Basic and Applied Ecology* 23, 1-73.
- 517 24. Grime, J. P. (1998). Benefits of plant diversity to ecosystems: immediate, filter and  
518 founder effects. *Journal of Ecology* 86, 902-910.
- 519 25. Botta-Dukát, Z. (2005). Rao's quadratic entropy as a measure of functional diversity  
520 based on multiple traits. *Journal of Vegetation Science* 16, 533-540.
- 521 26. Cadotte, M. W., Carscadden, K. & Mirotnick, N. (2011). Beyond species: functional  
522 diversity and the maintenance of ecological processes and services. *Journal of Applied*  
523 *Ecology* 48, 1079-1087.

- 524 27. Sørensen, T. (1948). A method of establishing groups of equal amplitude in plant  
525 sociology based on similarity of species and its application to analyses of the vegetation  
526 on Danish commons. *Kongelige Danske Videnskabernes Selskab* 5, 1-34.
- 527 28. Hector, A. & Bagchi, R. (2007). Biodiversity and ecosystem multifunctionality. *Nature*  
528 448, 188-191.
- 529 29. Des Roches, S., Post, D. M., Turley, N. E., Bailey, J. K., Hendry, A. P., Kinnison, M. T.,  
530 Schweitzer, J. A. & Palkovacs, E. P. (2017). The ecological importance of intraspecific  
531 variation. *Nature Ecology & Evolution* 2, 57-64.
- 532 30. Cramer, W., Bondeau, A., Woodward, F. I., Prentice, I. C., Betts, R. A., Brovkin, V.,  
533 Cox, P. M., Fisher, V., Foley, J. A., Friend, J. A., Kucharik, C., Lomas, M. R.,  
534 Ramankutty, N., Sitch, S., Smith, B., White, A. & Young-Molling, C. (2001). Global  
535 response of terrestrial ecosystem structure and function to CO<sub>2</sub> and climate change:  
536 results from six dynamic global vegetation models. *Global Change Biology* 7, 357-373.
- 537 31. Scheiter, S., Langan, L. & Higgins, S. I. (2013). Next-generation dynamic vegetation  
538 models: learning from community ecology. *New Phytologist* 198, 957-969.
- 539 32. Millenium Ecosystem Assessment. (2005). *Ecosystems and human well-being: synthesis*.  
540 Island Press, Washington DC, USA.
- 541 33. IPBES. (2019). *Summary for policymakers of the global assessment report on*  
542 *biodiversity and ecosystem services of the Intergovernmental Science-Policy Platform on*  
543 *Biodiversity and Ecosystem Services*. IPBES secretariat, Bonn, Germany.
- 544 34. Jewell, M. D., Shipley, B., Low-Décarie, E., Tobner, C. M., Paquette, A., Messier, C. &  
545 Reich, P. B. (2016). Partitioning the effect of composition and diversity of tree  
546 communities on leaf litter decomposition and soil respiration. *Oikos* 126, 959-971.

- 547 35. Roscher, C., Schumacher, J., Gubsch, M., Lipowsky, A., Weigelt, A., Buchmann, N.,  
548 Schmid, B., Schulze, E.-D. (2018). Origin context of trait data matters for predictions of  
549 community performance of a grassland biodiversity experiment. *Ecology* 99, 1214-1226.
- 550 36. Garnier, E., Stahl, U., Laporte, M.-A., Kattge, J., Mougenot, I., Kühn, I., Laporte, B.,  
551 Amiaud, B., Ahrestani, F. S., Bönisch, G., Bunker, B. E., Cornelissen, J. H. C., Díaz, S.,  
552 Enquist, B. J., Gachet, S., Jaureguiberry, P., Kleyer, M., Lavorel, S., Maicher, L., Pérez-  
553 Harguindeguy, N., Poorter, H., Schildhauer, M., Shipley, B., Violle, C., Weiher, E.,  
554 Wirth, C., Wright, I. J. & Klotz, S. (2016). Towards a thesaurus of plant characteristics:  
555 an ecological contribution. *Journal of Ecology* 105, 298-309.
- 556 37. Ellenberg, H. (1996). Vegetation Mitteleuropas mit den Alpen in ökologischer,  
557 dynamischer und historischer Sicht. 5<sup>th</sup> ed., Ulmer, Stuttgart, Germany.
- 558 38. Roscher, C., Schumacher, J., Gubsch, M., Lipowsky, A., Weigelt, A., Buchmann, N.,  
559 Schulze, E.-D. & Schmid, B. (2018). Interspecific trait differences rather than  
560 intraspecific trait variation increase the extent and filling of community trait space with  
561 increasing plant diversity in experimental grasslands. *Perspectives in Plant Ecology,*  
562 *Evolution and Systematics* 33, 42-50.
- 563 39. Bates, D., Maechler, M., Bolker, B. & Walker, S. (2015). Fitting linear mixed-effects  
564 models using lme4. *Journal of Statistical Software* 67, 1-48.
- 565 40. R Core Team. (2018). *R: A language and environment for statistical computing*. Vienna,  
566 Austria.
- 567 41. Nakagawa, S. & Schielzeth, H. (2013). A general and simple method for obtaining  $R^2$   
568 from generalized linear mixed-effects models. *Methods in Ecology and Evolution* 4, 133-  
569 142.

- 570 42. Bartón, K. (2014). *Package 'MuMIn'. Model selection and model averaging based on*  
571 *information criteria*. R package version 3.0.2.
- 572 43. Benjamini, Y. & Hochberg, Y. (1995). Controlling the false discovery rate: a practical  
573 and powerful approach to multiple testing. *Journal of the Royal Statistical Society Series*  
574 *B* 57, 289-300.
- 575

576 **SUPPLEMENTARY MATERIALS**

577

578 **S1. SUPPLEMENTARY METHODS**

579

580 *S1.1. Ecosystem function measurements*

581           During the years 2002 until 2012, 42 different ecosystem functions were measured. Some  
582 ecosystem functions were measured in multiple seasons or years, although always using  
583 standardized protocols. An overview of the different ecosystem functions can be seen in Table

584 S1.1.

585

586

587 Table S1.1. List of all ecosystem functions analyzed in this study.

| Ecosystem function               | unit                               | Summary description                                           | Years measured                   |
|----------------------------------|------------------------------------|---------------------------------------------------------------|----------------------------------|
| Consumed plant biomass           | g m <sup>-2</sup>                  | Biomass consumed by herbivores                                | 2010-2012                        |
| Herbivory rate                   | %                                  | % of leaves damaged                                           | 2003-2005, 2010-2012             |
| Frequency pollinator visits      | nr                                 | Number of observed pollinator visits                          | 2005, 2006, 2008                 |
| Abundance soil surface fauna     | nr                                 | Abundance of invertebrates caught in pitfall traps            | 2003, 2005, 2010                 |
| Richness soil surface fauna      | nr                                 | Species richness of invertebrates caught in pitfall traps     | 2003, 2005, 2010                 |
| Abundance vegetation layer fauna | nr                                 | Abundance of invertebrates caught via suction sampling        | 2003, 2005, 2010                 |
| Richness vegetation layer fauna  | nr                                 | Species richness of invertebrates caught via suction sampling | 2003, 2005, 2010                 |
| Number of pollinator species     | nr                                 | Number of observed pollinator species                         | 2005, 2006, 2008                 |
| Drought resilience               | g m <sup>-2</sup>                  | Resistance biomass production after drought                   | 2009-2012                        |
| Drought resistance               | g m <sup>-2</sup>                  | Resistance biomass production to drought                      | 2008-2012                        |
| Leaf Area Index                  | unitless                           | Leaf area index (measure of light interception)               | 2003-2012                        |
| Bare ground cover                | %                                  | Cover of bare ground                                          | 2002-2011                        |
| Target plant biomass             | g m <sup>-2</sup>                  | Aboveground dry mass of target species                        | 2002-2012                        |
| Dead plant biomass               | g m <sup>-2</sup>                  | Aboveground dry mass of dead target species                   | 2003-2008                        |
| Cover invasive species           | %                                  | Cover of non-target plant species                             | 2003-2007                        |
| Richness invasive species        | nr                                 | Number of non-target plant species                            | 2003-2007                        |
| Rain throughfall                 | mm                                 | Amount of rainwater reaching lower vegetation layers          | 2008-2012                        |
| Basal soil respiration           | μL g <sup>-1</sup> h <sup>-1</sup> | Basal soil respiration (proxy of decomposition)               | 2003-2008, 2010-2012             |
| Soil respiratory quotient        | μL g <sup>-1</sup> h <sup>-1</sup> | Respiration per biomass soil microbes                         | 2008, 2010-2012                  |
| Earthworm biomass                | g                                  | Biomass of earthworms                                         | 2003-2008                        |
| Soil larvae abundance            | nr                                 | Number of larvae in soil                                      | 2004, 2006, 2008                 |
| Soil mesofauna abundance         | nr                                 | Count of mesofauna individuals in soil                        | 2004, 2006, 2008                 |
| Soil macrofauna abundance        | nr                                 | Count of macrofauna individuals in soil                       | 2004, 2006, 2008                 |
| Biomass soil microbes            | μg C g <sup>-1</sup>               | Biomass of microbes in soil                                   | 2003, 2004, 2006-2008, 2010-2012 |
| Biomass plant roots              | g                                  | Belowground plant biomass in soil                             | 2003, 2004, 2006-2008, 2011      |
| Downward flux water upper soil   | L m <sup>-2</sup>                  | Downward flux of water in upper soil                          | 2003-2007                        |
| Downward flux water deep soil    | L m <sup>-2</sup>                  | Downward flux of water in deeper soil                         | 2003-2007                        |
| Upward flux water upper soil     | L m <sup>-2</sup>                  | Upward flux of water in upper soil                            | 2003-2007                        |
| Upward flux water deep soil      | L m <sup>-2</sup>                  | Upward flux of water in deeper soil                           | 2003-2007                        |
| Evapotranspiration upper soil    | L m <sup>-2</sup>                  | Evapotranspiration in upper soil                              | 2003-2007                        |
| Evapotranspiration deep soil     | L m <sup>-2</sup>                  | Evapotranspiration in deeper soil                             | 2003-2007                        |
| Upper soil water content         | L m <sup>-2</sup>                  | Water content in upper soil                                   | 2003-2007                        |
| Deep soil water content          | L m <sup>-2</sup>                  | Water content in deeper soil                                  | 2003-2007                        |
| Inorganic soil carbon            | %                                  | Concentration of inorganic carbon in soil                     | 2002, 2004, 2006                 |
| Organic soil carbon              | %                                  | Concentration of organic carbon in soil                       | 2002, 2004, 2006                 |
| Bulk density soil                | g m <sup>-3</sup>                  | Bulk density soil (proxy for compaction)                      | 2002, 2004, 2006                 |
| Nitrogen content soil            | %                                  | Soil total nitrogen content                                   | 2002, 2004, 2006                 |
| Soil 15N                         | ‰                                  | Soil nitrogen isotope ratios                                  | 2002, 2004, 2006                 |
| Soil NH4 content                 | μg g <sup>-1</sup>                 | Soil ammonium concentration                                   | 2002-2008                        |
| Soil NO3 content                 | μg g <sup>-1</sup>                 | Soil nitrate concentration                                    | 2002-2008                        |
| Nitrate leaching                 | mg m <sup>-2</sup>                 | Nitrate leaching                                              | 2002-2006                        |
| Soil phosphate content           | mg L <sup>-1</sup>                 | Soil phosphate content                                        | 2003-2007, 2009, 2011, 2012      |

588

589

590 *SI.1.1. Consumed plant biomass*

591 Herbivory rates were converted into estimates of consumed plant biomass in three steps. First,  
592 the total leaf biomass of a species in a plot was estimated from the species-specific aboveground  
593 biomass that included the biomass of leaves, stems, and inflorescences, using the ratio of leaf  
594 biomass to total aboveground biomass. Second, the leaf biomass of each species in each mixture  
595 was multiplied by the respective herbivory rate to obtain the leaf biomass consumed from this  
596 species in gram dry weight per square meter. Third, the total biomass removed from a particular  
597 plant community was calculated by summing the consumed leaf biomass over all plant species in  
598 the community<sup>44,45</sup>.

599

600 *SI.1.2. Herbivory rate*

601 Large vertebrates were excluded from the experimental site by a fence such that  
602 herbivory was only caused by invertebrates (though there was occasional grazing by voles).  
603 Herbivory was measured during the biomass harvest twice a year – typically at the end of May  
604 and the end of August. Herbivory was measured in five years (2012 to 2014)<sup>44,45</sup>. For each target  
605 species present in the sorted biomass samples, usually, 30 fully developed leaves (only 20 in  
606 2012 and 2013) were sampled randomly for herbivory measurements. For species with fewer  
607 than the target number of leaves in the sample, all available leaves were measured. The leaf area  
608 of all sampled leaves (i.e. the area left after feeding of the herbivores including petioles) was  
609 measured with a leaf area meter (LI-3000C Area Meter, LI-COR Biosciences, Lincoln (NE),  
610 USA). Herbivore damage (i.e., the leaf area damaged by herbivores in mm<sup>2</sup>) was estimated  
611 visually by comparing the damaged leaf area to a series of circular and square templates ranging  
612 in size from 1 mm<sup>2</sup> to 500 mm<sup>2</sup>. Herbivory damage included four different herbivory damage

613 types: chewing, sap sucking, leaf mining and rasping damage. For each leaf, a single value of the  
614 total area damaged by all types of herbivory was estimated. Herbivory rates (the proportion of  
615 leaf area damage) for each plant species in a mixture was calculated by dividing the estimated  
616 area damaged by herbivores by the original leaf area without damage. To obtain the total leaf  
617 area before herbivore feeding, we summed the leaf area remaining after feeding by herbivores  
618 that was measured with a leaf-area meter and the leaf area removed by chewing herbivores using  
619 plant species-specific ratios of herbivory damage types. A community level herbivory rate was  
620 calculated by summing the species-specific herbivory rates weighted by their respective relative  
621 leaf biomass for each biomass sample. For a detailed description of the methodology used see  
622 Meyer et al. 2017<sup>45</sup>.

623

### 624 *SI.1.3. Frequency of pollinator visits*

625 We observed flower-pollinator interactions within a quadrat of 80x80cm three times during the  
626 vegetation period in 2005, 2006 and 2008<sup>46,47</sup>. During the six-minute observation period every  
627 interaction was counted as a flower visitation. Observations were only conducted on sunny days  
628 between 09:00 and 17:00 h.

629

### 630 *SI.1.4. Fauna soil surface abundance*

631 For recording the activity abundance of ground-dwelling arthropods, we installed two pitfall  
632 traps of 4.5 cm diameter per plot in 2003, 2005, and 2010<sup>48,49</sup>. Traps were replaced six times in  
633 2003 and 2005 between May and October, and every two weeks between May and September in  
634 2010. In the field we filled traps with 3% formalin, and stored them later in 70% ethanol.

635



636 *SI.1.5. Fauna soil surface species richness*

637 For recording the activity abundance of ground-dwelling arthropods, we installed two pitfall  
638 traps of 4.5 cm diameter per plot in 2003, 2005, and 2010<sup>48,49</sup>. Traps were replaced six times in  
639 2003 and 2005 between May and October, and every two weeks between May and September in  
640 2010. In the field we filled traps with 3% formalin, and stored them later in 70% ethanol.

641

642 *SI.1.6. Fauna vegetation abundance*

643 For recording the abundance of vegetation-associated arthropods we used suction sampling in  
644 2003, 2005, 2010<sup>48,49</sup>. Five (2003 and 2005) and nine (2010) times during the vegetation period  
645 we randomly placed cages of 0.75 m<sup>3</sup>, cleared them from arthropods, and stored all sampled  
646 animals in 70% ethanol.

647

648 *SI.1.7. Fauna vegetation species richness*

649 For recording the species richness of vegetation-associated arthropods we used suction sampling  
650 in 2003, 2005, 2010<sup>48,49</sup>. Five (2003 and 2005) and nine (2010) times during the vegetation  
651 period, we randomly placed cages of 0.75 m<sup>3</sup> and cleared them from arthropods. We stored all  
652 sampled animals in 70% ethanol and sent them to external taxonomists for species-level  
653 identification.

654

655 *SI.1.8. Pollinator species richness*

656 We observed flower-pollinator interactions within a quadrat of 80x80cm three times per year in  
657 2005, 2006 and 2008<sup>46,47</sup>. During the six-minute observation period we identified every flower-

658 visiting insects to species or morphospecies. Unknown species were captured for later  
659 identification. Observations were only conducted on sunny days between 09:00 and 17:00 h.

660

#### 661 *S1.1.9. Drought resilience*

662 We used data from the drought experiment established as 1x1 m subplots on 76 plots of the Jena  
663 Main Experiment in 2008. The two subplots per plot were designated as either drought or  
664 ambient control using rainout shelters constructed using wooden frames and transparent PVC  
665 roofs<sup>50</sup> (see Vogel et al. 2013 for details). Rainwater was collected in rain barrels and used to  
666 water ambient subplots following rainfall events<sup>50,51</sup>. Shelters were set up mid-summer and  
667 excluded natural rainfall from mid-July to the end of August (six weeks). Standing biomass was  
668 harvested in May and August (before removal of the shelters) as described for standing  
669 aboveground biomass.

670 We calculated resilience from our biomass data according to van Ruijven and Berendse<sup>52</sup>.

671 Resilience determines the change in biomass production after perturbation and was calculated as  
672 difference of post-drought biomass and the corresponding ambient treatment from the first  
673 harvest after drought (May the following year).

674

#### 675 *S1.1.10. Drought resistance*

676 Drought resistance was calculated based on the same data as drought resilience (S1.1.9). We  
677 calculated resistance from our biomass data according to van Ruijven and Berendse<sup>52</sup> as the  
678 difference of biomass under perturbed and unperturbed conditions (drought - ambient) at the end  
679 of the drought period in August.

680

681 *S1.1.11. Leaf area index*

682 Community leaf area index (LAI) was measured twice a year just before biomass harvest (see  
683 S1.1.13) with a LAI-2000 plant canopy analyzer (LI-COR) using high resolution and a view cap  
684 masking 45° of the azimuth towards the operator. In 2003 and 2004, 10 randomly allocated  
685 measurements were taken at 5 cm height within an area of 3 x 3 m in the center of the core area.  
686 From 2005 onwards all measurements were taken along a 10 m transect in the core area of each  
687 experimental plot. One above reading was taken at the first transect point, followed by 10 below  
688 readings taken with 1 m distance from each other. We used the mean over the 10 calculated LAI  
689 values from the below readings as mean community LAI per plot.

690

691 *S1.1.12. Bare ground cover*

692 Bare ground cover was visually estimated together with sown species cover in September 2002  
693 and twice a year just before biomass harvest. Bare ground cover was estimated directly as  
694 percentage of area. From 2002 to 2004, measurements were taken in two extra carefully weeded  
695 sub-areas of 2 x 2.25 m. We report the average value based on these two estimates for  
696 community cover. From 2005 onwards all measurements were taken in one 3 x 3 m area in the  
697 core area of each experimental plot.

698

699 *S1.1.13. Target aboveground plant biomass*

700 Aboveground community biomass was harvested twice a year just prior to mowing (during peak  
701 standing biomass in late May and in late August) on all experimental plots. This was done by  
702 clipping the vegetation at 3 cm above ground in two to four randomly selected rectangles of 0.2 x  
703 0.5 m per plot. The harvested biomass was sorted into sown species, total weeds and detached

704 dead organic material and dried to constant weight (70°C, ≥ 48 h). Target aboveground plant  
705 biomass was calculated as the sum of biomass for all sown species from all rectangles per plot.

706

707 *S1.1.14. Dead plant biomass*

708 Sum of biomass of detached dead organic material from all rectangles per plot as described in  
709 target aboveground plant biomass.

710

711 *S1.1.15. Cover invasive species*

712 Cover of invader species was visually estimated to the nearest percentage before weeding (spring  
713 = April, summer = July) on the same subplot size as used for the quantification of invader  
714 species richness (S1.1.16) in each large plot from 2003 to 2007. In the field, invader species  
715 cover was separately recorded for internal invader species (i.e. species belonging to the  
716 experimental species pool, but not to the sown species composition of the respective plot) and  
717 external invader species (i.e. species not belonging to the experimental species pool). Cover of  
718 internal and external invader species was summed to get the total cover of invader species<sup>53</sup>.

719

720 *S1.1.16. Richness invasive species*

721 Within each large plot one subplot of 2.00 × 2.25 m was permanently marked to quantify  
722 invasion resistance from 2003 to 2007. All invader species present in this subplot were recorded  
723 before weeding (spring = April, summer = July) to assess invader species richness<sup>53</sup>.

724

725 *S1.1.17. Rain throughfall*

726 In biweekly intervals from 2008 to 2012, throughfall volume was collected with rain collectors  
727 (2-L sampling bottles connected to funnels [diameter of 0.12 m], both polyethylene). The  
728 sampling bottles were protected against larger particles and small animals with a polyethylene  
729 net (0.005 m mesh width). The collectors were cleaned with deionized water before installation  
730 and replaced by clean collectors in 2- to 3-month intervals.

731

#### 732 *SI.1.19. Basal soil respiration*

733 In each year, five randomly located soil samples were taken per plot with a soil corer (5 cm  
734 diameter, 5 cm deep) and pooled plot-wise. Before measuring, all samples were homogenized,  
735 sieved (2 mm), larger roots and soil animals were picked by hand, and samples were stored in  
736 plastic bags at 5°C. Microbial respiration was measured using an electrolytic O<sub>2</sub>-  
737 microcompensation apparatus<sup>54</sup>. O<sub>2</sub> consumption of soil microorganisms in ~5 g of fresh soil  
738 (equivalent to c. 3.5 g soil dry weight) was measured at 22°C over a period of 24 h. Basal  
739 respiration [ $\mu\text{L O}_2 \text{ g}^{-1} \text{ dry soil h}^{-1}$ ] was calculated as mean of the O<sub>2</sub> consumption rates of hours  
740 14 to 24 after the start of the measurements.

741

#### 742 *SI.1.19. Soil respiratory quotient*

743 In each year, five randomly located soil samples were taken per plot with a soil corer (5 cm  
744 diameter, 5 cm deep) and pooled plot-wise. Before measuring, all samples were homogenized,  
745 sieved (2 mm), larger roots and soil animals were picked by hand, and samples were stored in  
746 plastic bags at 5°C. Microbial respiration was measured using an electrolytic O<sub>2</sub>-  
747 microcompensation apparatus<sup>54</sup>. O<sub>2</sub> consumption of soil microorganisms in ~5 g of fresh soil  
748 (equivalent to c. 3.5 g soil dry weight) was measured at 22°C over a period of 24 h. Basal

749 respiration [ $\mu\text{L O}_2 \text{ g}^{-1} \text{ dry soil h}^{-1}$ ] was calculated as mean of the  $\text{O}_2$  consumption rates of hours  
750 14 to 24 after the start of the measurements. Substrate-induced respiration (SIR) was determined  
751 by adding D-glucose to saturate catabolic enzymes of the microorganisms according to  
752 preliminary studies (4 mg D-glucose  $\text{g}^{-1}$  dry soil solved in 400  $\mu\text{L}$  deionized water<sup>55</sup>). The  
753 maximum initial respiratory response (MIRR; [ $\mu\text{L O}_2 \text{ g}^{-1} \text{ dry soil h}^{-1}$ ]) was calculated as mean of  
754 the lowest three  $\text{O}_2$ -consumption values within the first 10 h after glucose addition. Microbial  
755 biomass carbon [ $\mu\text{g C g}^{-1}$  dry soil] was calculated as  $38 \times \text{MIRR}$ <sup>56</sup>. The soil respiratory quotient  
756 was calculated by dividing basal respiration by microbial biomass<sup>57</sup>.

757

#### 758 *S1.1.20. Earthworm biomass*

759 Earthworm extractions were performed on one subplot of 1 x 1 m per plot that was established to  
760 extract earthworms repeatedly. Subplots were enclosed with PVC shields aboveground (20 cm)  
761 and belowground (15 cm). Two earthworm extraction campaigns were performed twice per year  
762 in spring and autumn of 2005, 2006, and 2008 by electro-shocking<sup>58</sup>. Therefore, a combination  
763 of four octet devices (DEKA 4000, Deka Gera<sup>te</sup> bau, Marsberg, Germany; Thielemann<sup>59</sup>) was  
764 used which were powered by two 12 V car batteries. Eight steel rods (length 60 cm) were  
765 inserted into the soil (to a depth of w55 cm) per octet device forming four circles of six rods  
766 (each 50 cm in diameter) with two rods in the center of each  
767 circle. An electrical voltage was applied in pulses to the moist soil (earthworm extractions were  
768 always performed during humid and mild weather conditions) sequentially to pairs of rods in  
769 the circle (negative pole) and in the center of the circle (positive pole). In each subplot  
770 earthworm extraction was performed for 35 min, increasing the voltage from 250 V (10 min) to  
771 300 V (5 min), 400 V (5 min), 500 V (5 min), and 600 V (10 min). Despite the PVC shields,

772 earthworms re-colonized earthworm subplots until the next extraction campaign<sup>58</sup>. Extracted  
773 earthworms were identified, counted and weighed in the laboratory.

774

#### 775 *SI.1.21. Soil larvae abundance*

776 Soil macrofauna was collected from soil cores taken to a depth of 10 cm in autumn 2004  
777 (October), 2006 (November) and 2008 (October). Soil cores were taken using a steel corer (22  
778 cm diameter). One soil core per plot was taken, and soil animals were extracted by heat<sup>60</sup>,  
779 collected in diluted glycerol, and transferred into ethanol (70%) for storage. Soil animals were  
780 identified<sup>61-63</sup> and counted. A detailed list of soil animal taxa and their trophic assignment is  
781 given in Eisenhauer et al. (2011)<sup>64</sup>.

782

#### 783 *SI.1.22. Soil mesofauna abundance*

784 Soil mesofauna was collected from soil cores taken to a depth of 10 cm in autumn 2004  
785 (October), 2006 (November) and 2008 (October). Soil cores were taken using a steel corer (5 cm  
786 diameter). One soil core per plot was taken, and soil animals were extracted by heat<sup>60</sup>, collected  
787 in diluted glycerol, and transferred into ethanol (70%) for storage. Soil animals were identified<sup>65-</sup>  
788 <sup>67</sup> and counted. A detailed list of soil animal taxa and their trophic assignment is given in  
789 Eisenhauer et al. (2011)<sup>64</sup>.

790

#### 791 *SI.1.23. Soil macrofauna abundance*

792 Soil macrofauna was collected from soil cores taken to a depth of 10 cm in autumn 2004  
793 (October), 2006 (November) and 2008 (October). Soil cores were taken using a steel corer (22  
794 cm diameter). One soil core per plot was taken, and soil animals were extracted by heat<sup>60</sup>,

795 collected in diluted glycerol, and transferred into ethanol (70%) for storage. Soil animals were  
796 identified<sup>65-67</sup> and counted. A detailed list of soil animal taxa and their trophic assignment is  
797 given in Eisenhauer et al. (2011)<sup>64</sup>.

798

#### 799 *SI.1.24. Soil microbial biomass*

800 In each year, five randomly located soil samples were taken per plot with a soil corer (5 cm  
801 diameter, 5 cm deep) and pooled plot-wise. Before measuring, all samples were homogenized,  
802 sieved (2 mm), larger roots and soil animals were picked by hand, and samples were stored in  
803 plastic bags at 5°C. Soil microbial biomass respiration was measured using an electrolytic O<sub>2</sub>-  
804 microcompensation apparatus<sup>54</sup>. O<sub>2</sub> consumption of soil microorganisms in ~5 g of fresh soil  
805 (equivalent to c. 3.5 g soil dry weight) was measured at 22°C over a period of 24 h. Substrate-  
806 induced respiration (SIR) was determined by adding D-glucose to saturate catabolic enzymes of  
807 the microorganisms according to preliminary studies (4 mg D-glucose g<sup>-1</sup> dry soil solved in 400  
808 µL deionized water<sup>55</sup>). The maximum initial respiratory response (MIRR; [µL O<sub>2</sub> g<sup>-1</sup> dry soil h<sup>-1</sup>])  
809 was calculated as mean of the lowest three O<sub>2</sub>-consumption values within the first 10 h after  
810 glucose addition. Microbial biomass carbon [µg C g<sup>-1</sup> dry soil] was calculated as 38 × MIRR<sup>56</sup>.  
811 The soil respiratory quotient was calculated by dividing basal respiration by microbial biomass<sup>57</sup>.

812

#### 813 *SI.1.25. Plant root biomass*

814 Standing root biomass was sampled down to 30 cm depth in all plots in June 2003, September  
815 2004, and June 2006, 2008 and 2011. Two monoculture plots were excluded because of poor  
816 establishment. In all years we took several soil cores per plot and processed the pooled samples  
817 (2003: 5 cores with 4.8 cm diameter; 2004: 3 cores with 4.8 cm diameter; 2006: 5 cores with 8.7



818 cm diameter; 2008: 3 cores with 4.8 cm diameter; 2011: 3 cores with 3.5 cm diameter). The  
819 cores were cooled (4 °C; frozen in 2006) until further handling. The bulk material of the pooled  
820 cores was weighed and cut to 1 cm pieces before subsampling. For root washing, a 50 g  
821 subsample was soaked in water and then repeatedly rinsed with tap water over a 0.5 mm sieve. In  
822 2011, the full bulk sample was washed for root material. Roots were dried at 60 – 70 °C and  
823 weighed subsequently.

824

#### 825 *SI.1.26. Upper (0-30 cm) and deep (0-70 cm) soil water content*

826 Volumetric soil water contents were measured with frequency domain reflectometry (FDR)  
827 using a mobile manual FDR probe (PR1/6 and PR2/6, Delta-T-Devices, Cambridge, UK) on all  
828 plots in 1–2 weekly resolution in the 0.1, 0.2, 0.3, 0.4, and 0.6 m soil depths<sup>68,69</sup>.

829 Soil water contents per plot were aggregated to depth-weighted means for the 0-0.3 m (“upper  
830 soil”) and 0.3-0.7 m (“deep soil”) soil layers. At a central automatic meteorological station on the  
831 field site, soil water contents in the 0.08, 0.16, 0.32, and 0.64 m soil depths were measured with  
832 Theta Probe soil moisture sensors – ML2x (Delta-T Devices, Cambridge, UK) in 10-min  
833 resolution between 1 July 2002 and 31 December 2007 and aggregated to daily depth-weighted  
834 means for the 0.0-0.3 and 0.3-0.7 m soil layers. To obtain a complete soil water contents data set  
835 for the 0.0-0.3 and 0.3-0.7 m soil layer per plot for the years 2003-2007, data gaps were filled  
836 with Bayesian hierarchical models using the soil water contents from the central meteorological  
837 station as explanatory variable<sup>70</sup>.

838

839 *SI.1.27. Downward and upward flux and evapotranspiration of soil water, in upper and deep*  
840 *soil*

841 A water balance model was used to simulate downward and upward water fluxes and actual  
842 evapotranspiration from the 0-0.3 m (“upper soil”) and the 0.3-0.7 m (“deep soil”) soil layers per  
843 plot for the years 2003-2007 in weekly resolution<sup>70</sup>. The model uses the input variables  
844 precipitation (measured at the central meteorological station in 10-min resolution), potential  
845 evapotranspiration (calculated from meteorological data from the central station using the  
846 Penman-Wendling equation), and volumetric soil water contents (see S1.1.26). The model is  
847 based on the water balance equation: precipitation + upward flux = downward flux + actual  
848 evapotranspiration - change in volumetric soil water content between two subsequent  
849 observation dates. The percentage of roots in each soil layer was used as a proxy for the  
850 percentage of potential evapotranspiration that could be evaporated from the respective soil  
851 layer. Together with using the net flux (downward flux - upward flux) from the upper soil layer  
852 as input into the deep soil layer, this allowed for modeling of the water fluxes for the two soil  
853 layers 0-0.3 m and 0.3-0.7 m separately<sup>70</sup>.

854

#### 855 *S1.1.28. Inorganic and organic soil carbon*

856 Total carbon concentration was analyzed biannually on ball-milled sub-samples by an elemental  
857 analyzer at 1150 °C (Elementaranalysator vario Max CN, Elementar Analysensysteme GmbH,  
858 Hanau, Germany). To determine the organic carbon concentration we measured inorganic carbon  
859 concentration by elemental analysis at 1150 °C after removal of organic carbon for 16 h at 450  
860 °C in a muffle furnace. Organic carbon concentration was then calculated from the difference  
861 between both measurements<sup>71,72</sup>.

862

#### 863 *S1.1.29. Soil bulk density*

864 In 2002, soil bulk density in the plough horizon was determined on 27 plots from undisturbed  
865 soil samples with a depth resolution of 10 cm. The respective samples were taken with a metal  
866 bulk density ring of 10 cm height, passed through a sieve with 2 mm mesh size, dried to constant  
867 weight at 105 °C and were subsequently weighed to calculate the density. The chosen plots  
868 represented a spatial gradient across the field site and resulted in average soil bulk density  
869 estimations at the beginning of the experiment. Starting in 2004 all bi-annually soil samples were  
870 taken with the split tube sampler, dried and weighed to detect changes in the bulk density. The  
871 inner diameter of the soil corer was used for volume calculation<sup>71</sup>.

872

#### 873 *SI.1.30. Total soil nitrogen*

874 Total nitrogen concentration was analyzed bi annually on ball-milled sub-samples by an  
875 elemental analyzer at 1150 °C (Elementaranalysator vario Max CN, Elementar Analysensysteme  
876 GmbH, Hanau, Germany)<sup>71,72</sup>.

877

#### 878 *SI.1.31 Soil $\delta^{15}N$ values*

879 Soil nitrogen isotope ratios (i.e. bulk soil  $\delta^{15}N$  values) were measured every two years from 50  
880 mg of dried soil (after grinding with a ball-mill) with an IRMS (Delta C prototype IRMS,  
881 Finnigan MAT)<sup>73</sup>.

882

#### 883 *SI.1.32. Soil $NH_4$ and soil $NO_3$*

884 Each autumn from 2002 to 2008, five soil cores (diameter 0.01 m) were taken at a depth of 0  
885 to 0.15 m of the mineral soil from each of the experimental plots and pooled. As an estimate of  
886 plant-available N,  $NO_3$ -N and  $NH_4$ -N concentrations were determined by extraction of

887 soil samples with 1 M KCl solution<sup>71</sup>. Nitrate-N and NH<sub>4</sub>-N concentrations were measured in  
888 the soil extract with a Continuous Flow Analyzer (CFA, 2003–2005: Skalar, Breda, Netherlands;  
889 2006–2008: AutoAnalyzer, Seal, Burgess Hill, United Kingdom).

890

#### 891 *S1.1.33. Nitrate leaching*

892 Nitrate leaching was calculated by multiplying soil NO<sub>3</sub> concentrations (see S1.1.32) with  
893 downward fluxes of soil water (0-30 cm depth) (S1.1.27).

894

#### 895 *S1.1.34. Soil Phosphate*

896 Concentrations of soil phosphate were determined in soil solution, which was collected every  
897 two weeks (cumulative sample) between 2003 and 2007, 2009, 2011 and 2012 using suction  
898 plates with permanent vacuum at 30cm soil depth. Soil solution samples were then analysed  
899 photometrically with Continuous Flow Analysis (CFA; see 1.1.32). From these biweekly  
900 measurements, an annual average was calculated for each plot.

901

902

903 ***S1.2. Trait measurements***

904 Table S1.2: Overview of traits

| Trait                          | Unit                               | Description                                 |
|--------------------------------|------------------------------------|---------------------------------------------|
| shoot:root ratio               | $\text{g g}^{-1}$                  | Shoot mass per root mass                    |
| shoot:root N ratio             | unitless                           | Leaf nitrogen uptake / root nitrogen uptake |
| plant height                   | cm                                 | Standing height of the shoot                |
| leaf biomass production rate   | $\text{g day}^{-1}$                | Maximum daily leaf dry mass production      |
| total leaf area                | $\text{cm}^2$                      | Total area of all leaves of plant           |
| leaf area                      | $\text{mm}^2$                      | Average area of a single leaf               |
| leaf thickness                 | mm                                 | Leaf thickness                              |
| specific leaf area             | $\text{mm}^2 \text{g}^{-1}$        | Fresh leaf area per leaf dry mass           |
| leaf specific density          | $\text{g cm}^{-3}$                 | Leaf dry weight per leaf fresh volume       |
| leaf area ratio                | $\text{cm}^2 \text{g}^{-1}$        | Leaf area per shoot mass                    |
| leaf form coefficient          | $\text{mm}^2 \text{mm}$            | Leaf area divided by leaf perimeter         |
| leaf dry matter content        | $\text{g g}^{-1}$                  | Leaf dry weight per leaf fresh weight       |
| leaf C content                 | %                                  | Leaf carbon content                         |
| leaf N content                 | %                                  | Leaf nitrogen Content                       |
| leaf conductance               | $\mu\text{M s}^{-1} \text{A}^{-1}$ | Stomatal conductance per leaf area          |
| leaf toughness                 | N                                  | Leaf resistance to penetration              |
| stem diameter                  | mm                                 | Diameter of stem                            |
| stem specific density          | $\text{g cm}^{-3}$                 | Stem dry weight per stem fresh volume       |
| erectness                      | $\text{cm cm}^{-1}$                | Stretched height per standing height        |
| biomass fraction inflorescence | $\text{mg mg}^{-1}$                | Inflorescence:shoot biomass fraction        |
| inflorescences per shoot       | nr                                 | Number of inflorescences per shoot          |
| duration flowering             | ordinal                            | Duration of flowering period                |
| seeds projected area           | $\text{mm}^2$                      | Total area of individual seed               |
| nr seedlings                   | nr                                 | Number of plant seedlings within subplot    |
| seed weight                    | g                                  | Weight of 1000 seeds                        |
| seed width length ratio        | $\text{mm mm}^{-1}$                | Ratio of seed width to seed length          |
| seed dry matter content        | $\text{g g}^{-1}$                  | Seed dry weight per seed fresh weight       |
| root area                      | $\text{cm}^2$                      | Root area                                   |
| rooting depth                  | ordinal                            | Depth of the root system                    |
| root area distribution         | unitless                           | Evenness of vertical root area distribution |
| specific root area             | $\text{cm}^2 \text{g}^{-1}$        | Root surface area per root mass             |
| specific root length           | $\text{cm g}^{-1}$                 | Root length per root mass                   |
| root tissue density            | $\text{g cm}^{-3}$                 | Root dry weight per root volume             |
| root nitrogen uptake           | $\text{mg day}^{-1}$               | Nitrogen uptake into roots                  |
| root CN ratio                  | unitless                           | Root total carbon:nitrogen content          |
| root P content                 | %                                  | P content per root dry biomass              |
| root K content                 | %                                  | K content per root dry biomass              |
| root S content                 | %                                  | S content per root dry biomass              |
| root Ca content                | %                                  | Ca content per root dry biomass             |
| root Na content                | %                                  | Na content per root dry biomass             |
| nutrient uptake efficiency     | $\text{mg g}^{-1}$                 | Root nitrogen uptake:root biomass           |

906 Most of the functional traits listed in Table S1.2 (except for the seed traits and biomass fraction  
907 of inflorescences, number of inflorescences per shoot and number of seedlings) were measured  
908 in mesocosms. To this end, we obtained seeds of all 60 plant species used in the Jena  
909 Biodiversity Experiment from a seed supplier (Rieger Hoffmann GmbH, Blaufelden-  
910 Raboldshausen, Germany and Saaten Zeller e.K., Riedern, Germany). In April 2011 and 2012 we  
911 germinated the seeds in petri dishes and we planted seedlings of 1-3 weeks old into mesocosms,  
912 with for each species five replicates. Seedlings that dead within 4 weeks after transplanting were  
913 replaced. Mesocosms were made of PVC pipes (height = 60 cm, diameter = 15 cm). Mesocosms  
914 were placed outside in the Botanical Garden of Leipzig (Germany), in randomized blocks. Traits  
915 were measured after 12 weeks. For more details of the mesocosm design, we refer to Schroeder-  
916 Georgi *et al.*<sup>6</sup>.

917 For detailed methods on the trait measurements of shoot:root ratio, plant height, leaf biomass  
918 production rate, total leaf area, leaf area, leaf thickness, specific leaf area, leaf specific density,  
919 leaf area ratio, leaf dry matter content, leaf C content, leaf N content, leaf conductance, leaf  
920 toughness, stem specific density, erectness, root area distribution, specific root area, specific root  
921 length, root tissue density, root nitrogen uptake, root C:N ratio, we refer to Schroeder-Georgi *et*  
922 *al.*<sup>6</sup>. Shoot:root N ratio was calculated as the leaf nitrogen uptake divided by the root nitrogen  
923 uptake, based on measurements of Schroeder-Georgi *et al.*<sup>6</sup>. Leaf form coefficient was calculated  
924 as the leaf area (see above) divided by the leaf perimeter. Leaf perimeter was measured on the  
925 same picture from samples as leaf area, using the software WinFolia (Regent Instruments Inc.,  
926 Canada). Stem diameter was measured on the same stems as those used for stem specific density<sup>6</sup>  
927 and defined as the diameter of a stem in mm. Nitrogen uptake efficiency was calculated as the  
928 root nitrogen uptake divided by the root dry biomass (measurements from Schroeder-Georgi *et*

929 *al.*<sup>6</sup>). Root area was based on the root area measurements of Schroeder-Georgi *et al.*<sup>6</sup>. Duration  
930 of flowering was defined as the duration of the flowering period, and expressed using an ordinal  
931 scale: 1 (1 month), 2 (2 months), 3 (3 months) and 4 (more than three months). Root element  
932 contents (P, K, S, Ca, Na) were analyzed using a subsample of dried fine root material of each  
933 mesocosm. A microwave digestion system (Berghof Speedwave SW-2) was used to digest 0.2 g  
934 ground material for 50 min at 190° using 8ml HNO<sub>3</sub>, 3ml H<sub>2</sub>O<sub>2</sub>. The method was tested using  
935 standard reference material. Samples were analyzed using ICP-OES (Spectro Acros, Spectro  
936 Analytical Instrument). Seed traits were measured on a subsample of the seeds purchased for the  
937 mesocosm experiment (see above). Seeds were cleaned from all attached tissue (e.g. bracts from  
938 grass spikelets), placed in batches of 30 - 200 well apart in glass petri dishes and scanned using a  
939 flatbed scanner (resolution 800 dpi) and analyzed using WinSeedle (Reg. 2009a, Regent  
940 Instruments Inc., Canada). WinSeedle output provided data on seed length, seed width and seed  
941 projected area for individual seeds from each image. Seed projected area and seed width to  
942 length ratio were calculated as mean over individual seed measures per species. Seed batches  
943 were weighed fresh, dried (70°, 48 h), and weighed again to calculate seed dry matter content as  
944 dry weight per fresh weight for the total seed batch and the weight of 1000 seeds per species  
945 using the seed number measured with WinSeedle and seed dry weight. Data on duration of  
946 flowering was obtained from Roscher *et al.* 2014<sup>20</sup>. Rooting depth was also obtained from  
947 Roscher *et al.* 2014<sup>20</sup>. It was measured on an ordinal scale: 1 (up to 20 cm), 2 (up to 40 cm), 3  
948 (up to 60 cm), 4 (up to 100 cm) and 5 (> 100 cm). Biomass fraction of inflorescence  
949 ( $\text{mg}_{\text{inflorescence}} \text{mg}^{-1}_{\text{shoot}}$ ) and number of inflorescences per shoot were recorded in the small-area  
950 monocultures of the field experiment (between 2006 and 2009) or in a low-diversity mixture for  
951 three species not abundant enough in the monocultures. Five to seven shoot per species were

952 sampled. In the laboratory, the number of inflorescences per shoot was counted. Afterwards  
953 shoots were separated into compartments (stems, leaves and reproductive parts), the  
954 compartments were dried (48 h, 70°C) and weighed. The mass of reproductive parts was divided  
955 by summed biomass of all compartments per shoot to derive inflorescence mass fraction<sup>74</sup>.  
956 The number of seedlings (i.e. plant individuals with cotyledons) was counted in all small-area  
957 monocultures three times (April, July, October) in 2007 to account for species-specific  
958 differences of seedling emergence. Three quadrats of 0.3 × 0.3 m size per subplot were randomly  
959 placed for each census. Total numbers of emerged seedlings per m<sup>2</sup> were calculated for each  
960 monoculture based on pooled data from all census dates<sup>74</sup>.  
961  
962



963 **Table S1.3.** Pearson correlation coefficients between traits.

|                              | shoot root ratio | shoot:root N ratio | plant height | leaf biomass production rate | total leaf area | leaf area | leaf thickness | specific leaf area | leaf specific density | leaf area ratio | leaf firm coefficient | leaf dry matter content | leaf C content | leaf N content | conductance | toughness | stem diameter | stem specific density | anthesis | biomass inflorescence | inflorescence per shoot | duration flowering | seeds projected area | seed weight | seed width length ratio | seed dry matter content | root area | root N ratio | root C content | root K content | root S content | root Ca content | root Na content | nutrient uptake efficiency |      |      |      |      |      |      |      |
|------------------------------|------------------|--------------------|--------------|------------------------------|-----------------|-----------|----------------|--------------------|-----------------------|-----------------|-----------------------|-------------------------|----------------|----------------|-------------|-----------|---------------|-----------------------|----------|-----------------------|-------------------------|--------------------|----------------------|-------------|-------------------------|-------------------------|-----------|--------------|----------------|----------------|----------------|-----------------|-----------------|----------------------------|------|------|------|------|------|------|------|
| shoot root ratio             | 1                | 0.17               | 0.07         | -0.3                         | 0.01            | -0.3      | 0.09           | 0.33               | -0.2                  | -0.3            | 0.36                  | -0.7                    | -0.1           | 0.32           | 0.04        | 0.04      | -0.3          | 0.28                  | 0.3      | -0.2                  | -0.1                    | 0.25               | -0.2                 | 0           | 0                       | 0.15                    | 0.21      | -0.2         | -0.2           | 0.24           | 0.03           | 0.43            | 0.38            |                            |      |      |      |      |      |      |      |
| shoot:root N ratio           | 0.17             | 1                  | -0.1         | -0.2                         | -0.1            | 0         | 0.24           | 0.15               | 0.21                  | 0.24            | 0.08                  | -0.2                    | -0.5           | -0.1           | 0.14        | -0.1      | -0.3          | 0.18                  | -0.3     | -0.1                  | 0                       | -0.1               | -0.4                 | -0.3        | -0.2                    | -0.3                    | -0.3      | -0.2         | 0.57           | 0.31           | -0.3           | 0.19            | -0.2            | 0.41                       | -0.1 | 0    | -0.1 | 0.42 |      |      |      |
| plant height                 | 0.07             | -0.1               | 1            | 0.37                         | 0.27            | -0.1      | -0.2           | -0.2               | -0.2                  | 0               | 0.47                  | 0.2                     | -0.2           | 0.07           | 0.27        | -0.1      | 0.3           | 0.46                  | -0.1     | -0.1                  | -0.1                    | -0.1               | -0.1                 | -0.1        | -0.1                    | -0.1                    | 0.45      | 0.27         | 0.4            | 0.25           | -0.2           | 0.09            | 0.04            | 0.39                       | -0.4 | -0.3 | -0.4 | -0.1 | -0.2 | -0.2 |      |
| leaf biomass production rate | -0.3             | -0.2               | 0.37         | 1                            | -0.53           | 0.09      | -0.1           | -0.3               | 0.12                  | -0.3            | 0.38                  | 0.09                    | -0.5           | -0.1           | 0.46        | 0.07      | 0.21          | 0.18                  | -0.1     | -0.1                  | -0.1                    | -0.1               | -0.1                 | -0.1        | -0.1                    | -0.1                    | 0.27      | 0.63         | 0.34           | 0.23           | -0.2           | -0.1            | 0.22            | 0.46                       | 0.16 | -0.3 | -0.5 | -0.1 | -0.3 | -0.4 |      |
| total leaf area              | 0.01             | -0.1               | 0.27         | -0.53                        | 1               | -0.1      | -0.2           | 0.03               | -0.1                  | -0.2            | 0.28                  | 0.17                    | 0.32           | -0.1           | 0.04        | 0.16      | 0             | 0.02                  | -0.1     | -0.1                  | -0.1                    | -0.1               | -0.1                 | -0.1        | -0.1                    | -0.1                    | 0.24      | 0.24         | 0.21           | 0.23           | -0.1           | -0.1            | 0.09            | 0.42                       | 0.19 | -0.2 | -0.3 | -0.1 | -0.1 | -0.1 | -0.2 |
| leaf area                    | -0.3             | -0.1               | 0.03         | -0.1                         | 0.15            | -0.4      | 0.19           | 0.15               | -0.1                  | -0.2            | -0.4                  | -0.3                    | -0.1           | -0.3           | 0.74        | -0.4      | 0.03          | 0.36                  | 0.23     | 0.15                  | 0.45                    | 0.33               | 0.09                 | -0.1        | -0.4                    | 0                       | 0.4       | 0.31         | -0.4           | 0.4            | 0.4            | 0.16            | 0.27            | -0.2                       | 0.02 | -0.2 | 0.09 | -0.2 | -0.2 | -0.2 |      |
| leaf thickness               | 0.09             | 0.24               | -0.2         | -0.1                         | -0.2            | 1         | -0.2           | 0.23               | 0.06                  | 0.18            | -0.4                  | -0.4                    | -0.1           | -0.1           | -0.1        | 0.23      | 0.2           | 0                     | 0.25     | -0.1                  | 0.05                    | -0.1               | -0.1                 | -0.1        | 0.09                    | -0.2                    | -0.1      | -0.1         | -0.1           | -0.1           | 0.14           | -0.1            | 0.11            | 0.25                       | 0.08 | 0.04 | 0.16 | 0.04 | 0.04 |      |      |
| specific leaf area           | 0.33             | 0.16               | -0.2         | -0.2                         | 0.02            | -0.2      | 0.2            | 1                  | 0.27                  | -0.2            | 0.15                  | 0.27                    | -0.1           | -0.15          | 0.37        | 0.07      | -0.2          | -0.2                  | 0.2      | -0.1                  | -0.3                    | -0.1               | -0.2                 | -0.2        | 0.06                    | 0.14                    | -0.2      | -0.2         | -0.2           | -0.2           | -0.2           | -0.2            | -0.2            | -0.2                       | -0.2 | -0.2 | -0.2 | -0.2 | -0.2 | -0.2 |      |
| leaf specific density        | -0.2             | 0.21               | -0.2         | -0.12                        | -0.19           | 0.23      | -0.2           | 0.1                | 1                     | -0.2            | 0                     | -0.4                    | -0.1           | -0.2           | 0.46        | 0.15      | -0.2          | 0.19                  | 0.23     | 0.06                  | -0.1                    | -0.1               | -0.1                 | -0.1        | -0.1                    | -0.1                    | -0.1      | -0.3         | 0.24           | 0.02           | 0.12           | -0.1            | -0.1            | 0.36                       | 0.2  | -0.2 | 0.09 | -0.2 | -0.1 | -0.2 | -0.1 |
| leaf area ratio              | -0.3             | 0.24               | -0.1         | -0.3                         | -0.15           | 0.06      | 0.31           | 0.1                | -0.17                 | -0.3            | -0.1                  | 0.21                    | -0.1           | -0.2           | 0.13        | -0.4      | 0.12          | 0.18                  | 0.26     | 0.09                  | -0.1                    | 0.25               | 0.1                  | 0.04        | -0.06                   | -0.2                    | -0.3      | -0.2         | 0.17           | 0.07           | -0.1           | 0.1             | 0.2             | 0.28                       | 0.35 | 0.23 | 0.01 | -0.1 | 0.31 |      |      |
| leaf firm coefficient        | 0.36             | 0.08               | -0.3         | -0.3                         | 0.25            | -0.1      | 0.18           | 0.27               | -0.2                  | 0.17            | -0.3                  | 0.12                    | 0.38           | -0.1           | -0.2        | -0.1      | -0.2          | -0.2                  | 0.12     | 0.15                  | 0.13                    | -0.2               | -0.2                 | -0.2        | 0.08                    | -0.2                    | -0.3      | -0.4         | 0.08           | -0.1           | -0.1           | 0.4             | 0.5             | 0.21                       | 0.48 | -0.1 | 0.37 | 0.18 |      |      |      |
| leaf dry matter content      | -0.2             | -0.2               | 0.47         | 0.38                         | 0.17            | -0.2      | -0.4           | -0.1               | -0.3                  | 0.39            | -0.1                  | -0.15                   | -0.4           | -0.28          | 0.08        | 0.04      | -0.4          | 0.03                  | 0.04     | -0.4                  | 0.03                    | -0.1               | 0.08                 | -0.1        | 0.08                    | -0.1                    | 0.32      | 0.42         | 0.16           | 0.05           | -0.12          | 0.05            | 0.18            | 0.35                       | -0.5 | -0.2 | -0.4 | -0.1 | -0.6 | -0.3 |      |
| leaf C content               | -0.1             | -0.5               | 0.2          | 0.03                         | 0.32            | -0.4      | -0.4           | 0.15               | -0.4                  | -0.1            | 0.12                  | 0.39                    | -0.4           | 0.47           | 0.18        | -0.1      | -0.1          | 0.15                  | -0.1     | -0.3                  | -0.1                    | -0.3               | -0.1                 | 0.01        | 0.06                    | 0.4                     | 0.3       | 0.3          | -0.4           | 0.12           | -0.1           | -0.2            | -0.2            | -0.1                       | -0.3 | 0.25 | -0.2 | 0.31 | 0.14 | -0.1 |      |
| leaf N content               | 0.32             | -0.1               | -0.2         | -0.5                         | -0.1            | -0.3      | -0.1           | 0.57               | -0.1                  | 0.21            | 0.38                  | -0.1                    | 0.47           | 0.18           | -0.3        | -0.3      | -0.1          | -0.2                  | -0.2     | 0.12                  | 0.15                    | 0.09               | -0.2                 | 0.28        | 0.49                    | -0.1                    | -0.4      | -0.1         | -0.2           | 0.06           | -0.1           | -0.2            | -0.2            | -0.2                       | -0.2 | -0.2 | -0.2 | 0.31 | 0.1  | 0.36 | 0.28 |
| conductance                  | 0.04             | -0.1               | 0.07         | -0.1                         | 0.04            | 0.1       | -0.1           | 0.07               | -0.2                  | -0.1            | 0.1                   | -0.18                   | 0.18           | -0.3           | -0.3        | -0.1      | -0.2          | -0.2                  | 0.12     | 0.15                  | 0.13                    | -0.2               | -0.2                 | -0.2        | 0.08                    | -0.2                    | 0.15      | 0.13         | -0.3           | -0.2           | 0.01           | 0.27            | 0.08            | -0.3                       | 0.13 | 0.4  | 0.13 | -0.4 | 0.4  | 0.06 | 0    |
| toughness                    | -0.3             | 0.14               | 0.27         | 0.46                         | 0.16            | -0.3      | -0.1           | -0.2               | 0.46                  | -0.2            | -0.4                  | 0.23                    | -0.1           | -0.3           | -0.3        | -0.2      | 0.06          | 0.21                  | 0.06     | -0.3                  | -0.4                    | -0.1               | -0.1                 | -0.1        | -0.2                    | -0.4                    | 0.06      | 0.53         | 0.04           | 0.01           | 0.28           | 0.28            | -0.2            | 0.33                       | 0.43 | -0.4 | -0.1 | -0.5 | -0.2 | -0.4 | -0.2 |
| stem diameter                | -0.38            | -0.1               | -0.1         | 0.07                         | 0.29            | 0.27      | -0.4           | 0.15               | 0.13                  | -0.1            | -0.4                  | -0.2                    | -0.2           | -0.2           | 1           | -0.4      | 0.08          | 0.24                  | 0.4      | 0.28                  | 0.18                    | 0.11               | 0.11                 | -0.1        | -0.3                    | 0.02                    | 0.37      | 0.23         | -0.4           | 0.4            | 0.32           | 0.23            | 0.23            | 0                          | -0.1 | -0.1 | 0.12 | -0.1 | -0.2 | -0.2 |      |
| stem specific density        | 0.04             | 0.3                | 0.21         | 0.02                         | -0.4            | -0.2      | 0.2            | -0.2               | 0.2                   | -0.4            | 0.28                  | 0.15                    | -0.1           | 0.06           | 0.06        | -0.4      | -0.3          | -0.2                  | -0.1     | 0.32                  | 0.11                    | 0.05               | 0.02                 | 0.01        | 0.27                    | 0.08                    | -0.3      | 0.15         | 0.13           | -0.3           | 0.14           | -0.3            | 0               | 0.13                       | -0.4 | 0.4  | -0.1 | 0.04 | 0    |      |      |
| erectedness                  | -0.3             | 0.34               | 0.46         | 0.18                         | -0.009          | 0         | -0.1           | 0.19               | 0.12                  | -0.3            | 0.08                  | -0.1                    | -0.2           | -0.2           | 0.21        | 0.08      | -0.1          | 0.08                  | -0.2     | -0.1                  | 0.07                    | 0.09               | -0.1                 | -0.4        | -0.1                    | 0.14                    | 0.09      | 0.07         | 0.07           | 0              | -0.09          | 0.38            | -0.4            | -0.3                       | -0.4 | -0.1 | -0.1 | -0.1 |      |      |      |
| biomass inflorescence        | -0.2             | 0.18               | -0.1         | -0.1                         | 0.36            | 0.25      | -0.3           | 0.23               | 0.18                  | -0.1            | 0.4                   | -0.3                    | -0.2           | -0.1           | 0.06        | 0.24      | 0.3           | 0.03                  | -0.1     | -0.1                  | -0.23                   | -0.2               | -0.1                 | -0.2        | -0.3                    | -0.1                    | -0.09     | 0.16         | 0.29           | 0.19           | 0.12           | 0.05            | 0.24            | -0.1                       | -0.1 | -0.3 | -0.4 | -0.1 |      |      |      |
| inflorescence per shoot      | -0.1             | -0.3               | -0.1         | -0.1                         | 0.1             | 0.23      | -0.1           | -0.1               | 0.06                  | 0.26            | 0.04                  | -0.1                    | -0.12          | 0.32           | -0.3        | 0.4       | -0.2          | -0.2                  | -0.1     | 0.28                  | 0.05                    | 0.23               | 0.19                 | 0.26        | -0.1                    | -0.1                    | 0.16      | 0.11         | -0.3           | -0.4           | 0.18           | 0.2             | 0.1             | 0.21                       | -0.1 | 0.13 | 0.09 | 0.26 | -0.1 |      |      |
| duration flowering           | 0.25             | -0.1               | -0.1         | -0.2                         | 0.12            | 0.15      | 0.05           | -0.1               | 0.04                  | 0.04            | 0.37                  | -0.4                    | -0.1           | 0.15           | 0.11        | -0.4      | 0.28          | -0.3                  | -0.1     | 0.28                  | 0.03                    | 0.23               | -0.1                 | 0.12        | -0.2                    | -0.3                    | -0.1      | 0.25         | -0.2           | -0.4           | -0.1           | -0.1            | -0.3            | 0.34                       | -0.1 | 0.39 | 0.07 | 0.42 | 0.18 |      |      |
| seeds projected area         | -0.2             | 0                  | -0.1         | -0.1                         | 0.45            | -0.1      | -0.2           | 0.19               | 0.1                   | -0.2            | 0.03                  | 0.1                     | 0.03           | 0.05           | -0.1        | 0.18      | -0.3          | 0.07                  | 0.23     | 0.05                  | 0.03                    | -0.1               | -0.53                | 0.02        | -0.3                    | -0.1                    | 0.19      | 0.15         | -0.3           | -0.5           | 0.15           | 0.08            | -0.15           | 0                          | 0.16 | 0.47 | 0.06 | 0.07 |      |      |      |
| seed weight                  | -0.1             | -0.1               | -0.1         | -0.08                        | 0.03            | -0.1      | 0.14           | -0.1               | 0.25                  | 0.09            | -0.1                  | 0.06                    | -0.02          | -0.1           | 0.11        | 0         | 0.09          | -0.2                  | 0.23     | 0.23                  | 0                       | -0.1               | -0.1                 | -0.1        | 0.1                     | -0.2                    | 0.05      | -0.1         | -0.1           | 0.03           | 0.03           | -0.1            | 0.15            | -0.1                       | 0.15 | -0.1 | -0.1 |      |      |      |      |
| seed width length ratio      | -0.2             | -0.4               | -0.1         | -0.1                         | -0.2            | 0.09      | -0.1           | -0.2               | -0.1                  | -0.1            | -0.3                  | 0.08                    | 0.4            | 0.23           | 0.01        | -0.2      | 0.11          | -0.2                  | -0.1     | 0.19                  | -0.1                    | 0.19               | -0.1                 | 0.53        | -0.1                    | 0.34                    | -0.1      | -0.2         | 0.23           | -0.1           | -0.4           | 0.3             | 0.05            | 0.09                       | -0.3 | 0.33 | -0.1 | 0.18 | 0.56 | 0.2  |      |
| seed dry matter content      | 0.15             | -0.3               | -0.1         | -0.4                         | -0.2            | -0.1      | 0.03           | 0.06               | -0.04                 | 0.28            | -0.1                  | 0.3                     | 0.49           | 0.27           | -0.4        | -0.1      | -0.1          | -0.4                  | -0.2     | 0.26                  | 0.12                    | 0.02               | -0.1                 | 0.30        | 0                       | -0.3                    | 0.05      | -0.1         | -0.1           | 0.2            | 0.02           | -0.1            | -0.4            | 0.50                       | 0.1  | 0.25 | 0.21 | 0.21 | 0.1  |      |      |
| root area                    | -0.2             | -0.2               | 0.45         | 0.27                         | 0.14            | -0.4      | -0.2           | 0.14               | -0.3                  | 0.6             | -0.08                 | 0.06                    | -0.3           | 0.78           | -0.1        | -0.3      | -0.1          | -0.2                  | 0.3      | 0                     | -0.1                    | 0                  | 0.09                 | 0.09        | -0.4                    | -0.1                    | 0.12      | 0.11         | 0              | 0.14           | -0.3           | -0.3            | -0.1            | -0.1                       | -0.2 | -0.1 | -0.1 |      |      |      |      |
| root N ratio                 | -0.3             | -0.3               | 0.27         | 0.63                         | 0.22            | 0         | -0.1           | -0.2               | 0.29                  | -0.2            | 0.32                  | -0.1                    | -0.4           | -0.3           | 0.53        | 0.02      | 0.03          | 0.19                  | -0.1     | -0.3                  | -0.1                    | 0.11               | -0.2                 | -0.3        | 0.09                    | 0.19                    | 0.2       | 0.04         | 0.04           | -0.51          | 0.52           | -0.7            | -0.2            | -0.5                       | -0.2 | -0.4 | -0.3 |      |      |      |      |
| root C content               | -0.2             | -0.3               | 0.4          | 0.34                         | 0.21            | 0.4       | -0.1           | 0.4                | 0.02                  | -0.3            | -0.3                  | 0.16                    | 0.17           | -0.1           | 0.15        | 0.04      | 0.37          | 0.05                  | 0.09     | -0.1                  | 0.16                    | -0.1               | 0.19                 | -0.2        | 0.23                    | 0.05                    | 0.09      | 0.15         | 0.47           | -0.4           | -0.6           | 0.43            | 0.27            | 0.3                        | -0.2 | -0.4 | -0.4 | 0.11 | -0.2 |      |      |
| root K content               | -0.2             | -0.2               | 0.25         | 0.23                         | 0.31            | -0.4      | -0.4           | 0.02               | -0.2                  | -0.4            | 0.05                  | -0.2                    | 0.13           | 0.01           | 0.25        | -0.4      | 0.07          | -0.11                 | 0.25     | 0.15                  | 0.05                    | -0.4               | -0.4                 | 0.47        | -0.3                    | -0.4                    | 0.11      | 0.16         | 0.21           | -0.1           | -0.2           | -0.1            | -0.2            | -0.1                       | -0.2 | -0.1 | -0.2 | -0.1 |      |      |      |
| specific root area           | 0.2              | 0.51               | -0.2         | -0.2                         | -0.1            | -0.4      | 0              | 0.43               | 0.12                  | 0.17            | 0.08                  | -0.2                    | 0.06           | -0.3           | 0.28        | -0.4      | 0.05          | 0.07                  | 0.05     | -0.3                  | -0.2                    | -0.3               | -0.4                 | -0.4        | -0.1                    | -0.1                    | 0.2       | -0.6         | -0.3           | -0.39          | -0.6           | -0.3            | -0.1            | -0.1                       | 0.35 | 0.08 | -0.  |      |      |      |      |

966 **S2. SUPPLEMENTARY RESULTS**

967

968 ***S2.2. Overview of final model outcomes***

969 On average, each trait significantly affected 4.9 out of the 42 ecosystem functions in the final  
970 models, and each ecosystem function was driven by 4.8 different traits. However, traits varied in  
971 the identity and number of ecosystem functions they drove, and vice versa, ecosystem functions  
972 varied in the identity and number of traits by which they were driven. Table S.2.1 gives an  
973 overview of which traits (their functional identity and/or their functional diversity) were  
974 significantly driving which functions in final models. Average marginal  $R^2$  values of models  
975 were 0.127. This was slightly lower (0.121) when FI and FD metrics based on presence-absence  
976 data (instead of abundance data) were used as predictors.

977

978 **Table S2.1** Ecosystem functions and their relationships with plant traits. Colored squares  
979 indicate whether the Functional Diversity and/or Community Weighted Mean of a given trait  
980 was present in the final model explaining the corresponding ecosystem function, and whether the  
981 effect was strongly negative (dark red,  $r < -0.5$ ), moderately negative (normal red,  $-0.5 \leq r < -$   
982  $0.3$ ), weakly negative (light red,  $-0.3 \leq r < -0.1$ ), neutral (yellowish,  $-0.1 \leq r < 0.1$ ), weakly  
983 positive (light blue,  $0.1 \leq r < 0.3$ ), moderately positive (normal blue,  $0.3 \leq r < 0.5$ ) or strongly  
984 positive (dark blue,  $r < 0.5$ ). When the Functional Diversity of the trait was the strongest  
985 predictor, FD is written in the cell; in all other cases, Functional Identity of the trait was the  
986 strongest predictor. The ecosystem functions analyzed in over 10% of the papers included in the  
987 mini-review are shown in bold. At the end of each row, a number is given indicating how many  
988 traits were significantly related to the corresponding ecosystem function. Similarly, at the bottom

989 of each column, a number is given indicating how ecosystem functions were significantly related  
 990 to the corresponding trait.

991

|                                  | shoot:root ratio | shoot:root N ratio | leaf biomass production rate | total leaf area | leaf area | leaf thickness | specific leaf area | leaf specific density | leaf area ratio | leaf form coefficient | leaf dry matter content | leaf C content | leaf N content | leaf conductance | leaf toughness | stem diameter | stem specific density | seediness | biomass fraction inflorescence | inflorescences per shoot | duration flowering | seeds projected area | seed weight | seed width length ratio | seed dry matter content | root area | rooting depth | root area distribution | specific root length | root tissue density | root nitrogen uptake | root P content | root K content | root S content | root Ca content | root Na content | nutrient uptake efficiency | number of predators | Marginal R <sup>2</sup> |      |      |      |      |
|----------------------------------|------------------|--------------------|------------------------------|-----------------|-----------|----------------|--------------------|-----------------------|-----------------|-----------------------|-------------------------|----------------|----------------|------------------|----------------|---------------|-----------------------|-----------|--------------------------------|--------------------------|--------------------|----------------------|-------------|-------------------------|-------------------------|-----------|---------------|------------------------|----------------------|---------------------|----------------------|----------------|----------------|----------------|-----------------|-----------------|----------------------------|---------------------|-------------------------|------|------|------|------|
| Consumed biomass                 |                  |                    | FD                           |                 |           |                |                    |                       |                 |                       | FD                      |                | FD             |                  |                |               | FD                    | FD        |                                |                          |                    |                      |             |                         |                         |           |               |                        |                      |                     |                      |                |                |                |                 |                 |                            |                     | 7                       | 0.40 |      |      |      |
| Herbivory rate                   |                  |                    |                              |                 |           |                |                    |                       |                 |                       |                         |                |                |                  |                |               |                       |           |                                |                          |                    |                      |             |                         |                         |           |               |                        |                      |                     |                      |                |                |                |                 |                 |                            |                     |                         | 6    | 0.13 |      |      |
| Frequency pollinators            |                  |                    |                              | FD              |           |                |                    |                       |                 |                       |                         |                |                |                  |                |               |                       |           |                                |                          |                    | FD                   |             |                         |                         |           |               |                        | FD                   |                     | FD                   |                |                |                |                 |                 |                            |                     |                         | 7    | 0.38 |      |      |
| Abundance soil surface fauna     |                  |                    |                              |                 |           |                |                    |                       |                 |                       | FD                      |                |                |                  |                |               |                       |           | FD                             |                          |                    |                      |             |                         |                         |           |               |                        |                      |                     |                      |                |                |                |                 |                 |                            |                     |                         | 5    | 0.05 |      |      |
| Richness soil surface fauna      |                  |                    |                              |                 |           |                |                    |                       |                 |                       |                         |                |                |                  |                |               |                       |           |                                |                          |                    |                      | FD          |                         |                         |           |               |                        |                      |                     |                      |                |                |                |                 |                 |                            |                     |                         | 2    | 0.03 |      |      |
| Abundance vegetation layer fauna |                  |                    |                              | FD              |           |                |                    | FD                    |                 |                       |                         |                |                | FD               |                |               |                       |           |                                |                          |                    |                      |             |                         |                         |           |               |                        |                      |                     |                      |                |                |                |                 |                 |                            |                     |                         | 6    | 0.19 |      |      |
| Richness vegetation layer fauna  | FD               |                    | FD                           |                 |           |                |                    |                       |                 |                       |                         |                |                |                  |                |               |                       |           |                                |                          |                    |                      |             |                         |                         |           |               |                        |                      |                     |                      |                |                |                |                 |                 |                            |                     |                         | 2    | 0.18 |      |      |
| Number of pollinators            | FD               |                    |                              |                 |           |                |                    |                       |                 |                       |                         |                |                |                  |                |               |                       |           |                                |                          |                    | FD                   |             |                         |                         |           |               |                        |                      |                     |                      |                |                |                |                 |                 |                            |                     |                         | 4    | 0.26 |      |      |
| Drought resilience               |                  |                    |                              |                 | FD        |                |                    |                       |                 |                       | FD                      |                |                |                  |                |               |                       |           |                                |                          |                    |                      |             |                         |                         | FD        |               | FD                     |                      |                     |                      |                |                |                |                 |                 |                            |                     |                         |      | 7    | 0.14 |      |
| Drought resistance               |                  |                    |                              |                 |           |                |                    |                       |                 |                       |                         |                |                |                  |                |               |                       |           |                                |                          |                    |                      |             |                         |                         |           |               |                        |                      |                     |                      |                |                |                |                 |                 |                            |                     |                         |      | 3    | 0.07 |      |
| Leaf area index                  |                  | FD                 |                              |                 |           |                |                    |                       |                 | FD                    |                         |                |                |                  |                |               |                       |           |                                |                          |                    |                      |             | FD                      | FD                      |           |               |                        |                      |                     |                      |                |                |                |                 |                 |                            |                     |                         |      | 11   | 0.38 |      |
| Background cover                 |                  |                    |                              |                 |           |                |                    |                       |                 |                       |                         |                |                |                  |                |               |                       |           |                                |                          |                    | FD                   |             |                         |                         |           |               |                        |                      |                     |                      |                |                |                |                 |                 |                            |                     |                         |      | 6    | 0.27 |      |
| Target plant biomass             |                  |                    |                              |                 |           |                |                    |                       | FD              | FD                    | FD                      |                |                |                  |                | FD            | FD                    |           |                                |                          |                    |                      |             |                         |                         | FD        |               |                        |                      |                     |                      |                |                |                |                 |                 |                            |                     |                         |      | 14   | 0.34 |      |
| Dead biomass                     |                  |                    |                              |                 |           |                |                    |                       |                 |                       |                         |                |                |                  |                |               |                       |           |                                |                          |                    |                      |             |                         |                         |           |               |                        |                      |                     |                      |                |                |                |                 |                 |                            |                     |                         |      | 7    | 0.11 |      |
| Cover invasive species           |                  |                    |                              |                 |           |                |                    |                       |                 |                       |                         |                |                |                  |                |               |                       |           |                                |                          |                    |                      |             |                         |                         |           |               |                        |                      |                     |                      |                |                |                |                 |                 |                            |                     |                         |      | 13   | 0.36 |      |
| Richness invasive species        |                  |                    |                              |                 |           |                |                    |                       |                 |                       |                         |                |                |                  |                |               |                       |           |                                |                          |                    |                      |             |                         |                         |           |               |                        |                      |                     |                      |                |                |                |                 |                 |                            |                     |                         |      | 6    | 0.29 |      |
| Rain throughfall                 |                  |                    |                              |                 |           |                |                    |                       |                 |                       |                         |                |                |                  |                |               |                       |           |                                |                          |                    |                      |             |                         |                         |           |               |                        |                      |                     |                      |                |                |                |                 |                 |                            |                     |                         |      |      | 1    | 0.01 |
| Basal soil respiration           |                  |                    |                              |                 |           |                |                    | FD                    |                 |                       |                         |                |                |                  |                | FD            |                       |           |                                |                          |                    |                      |             |                         |                         |           |               |                        |                      |                     |                      |                |                |                |                 |                 |                            |                     |                         |      | 4    | 0.06 |      |
| Soil respiratory quotients       |                  |                    |                              |                 |           |                |                    |                       |                 |                       |                         |                |                |                  |                |               |                       |           |                                |                          |                    |                      |             |                         | FD                      |           |               |                        |                      |                     |                      |                |                |                |                 |                 |                            |                     |                         |      |      | 4    | 0.08 |
| Earthworm biomass                |                  |                    |                              |                 |           |                |                    |                       |                 |                       |                         |                |                |                  |                |               |                       |           |                                |                          |                    |                      |             |                         |                         |           |               |                        |                      |                     |                      |                |                |                |                 |                 |                            |                     |                         |      | 5    | 0.10 |      |
| Soil invertebrate abundance      |                  |                    |                              |                 |           |                |                    |                       |                 |                       |                         |                |                |                  |                |               |                       |           |                                |                          |                    |                      |             |                         |                         |           |               |                        |                      |                     |                      |                |                |                |                 |                 |                            |                     |                         |      | 3    | 0.07 |      |
| Soil mesofauna abundance         |                  |                    |                              |                 |           |                |                    |                       |                 |                       |                         |                |                |                  |                |               |                       |           |                                |                          |                    |                      |             |                         |                         |           |               |                        |                      |                     |                      |                |                |                |                 |                 |                            |                     |                         |      | 6    | 0.17 |      |
| Soil macrofauna abundance        |                  |                    | FD                           |                 |           | FD             |                    |                       |                 |                       |                         |                |                |                  |                |               |                       |           |                                |                          |                    |                      |             |                         |                         |           |               |                        |                      |                     |                      |                |                |                |                 |                 |                            |                     |                         |      | 8    | 0.31 |      |
| Biomass soil microbes            |                  |                    |                              |                 |           |                |                    |                       |                 |                       |                         |                |                |                  |                |               |                       |           |                                |                          |                    |                      |             |                         |                         |           |               |                        |                      |                     |                      |                |                |                |                 |                 |                            |                     |                         |      | 3    | 0.08 |      |
| Biomass plant roots              |                  |                    | FD                           |                 |           |                |                    |                       |                 |                       |                         |                |                |                  |                |               |                       |           |                                |                          |                    |                      |             |                         |                         |           |               |                        |                      |                     |                      |                |                |                |                 |                 |                            |                     |                         |      | 6    | 0.12 |      |
| Downflow water upper soil        |                  |                    |                              |                 |           |                |                    |                       |                 |                       |                         |                |                |                  |                |               |                       |           |                                |                          |                    |                      |             |                         |                         |           |               |                        |                      |                     |                      |                |                |                |                 |                 |                            |                     |                         |      | 4    | 0.01 |      |
| Downflow water deeper soil       |                  |                    |                              |                 |           |                |                    |                       |                 |                       |                         |                |                |                  |                |               |                       |           |                                |                          |                    |                      |             |                         |                         |           |               |                        |                      |                     |                      |                |                |                |                 |                 |                            |                     |                         |      | 3    | 0.00 |      |
| Upflow upper soil                |                  |                    |                              |                 |           |                |                    |                       |                 |                       |                         |                |                |                  |                |               |                       |           |                                |                          |                    |                      |             |                         |                         |           |               |                        |                      |                     |                      |                |                |                |                 |                 |                            |                     |                         |      | 2    | 0.04 |      |
| Upflow deeper soil               |                  |                    |                              |                 |           |                |                    |                       |                 |                       |                         |                |                |                  |                |               |                       |           |                                |                          |                    |                      |             |                         |                         |           |               |                        |                      |                     |                      |                |                |                |                 |                 |                            |                     |                         |      | 3    | 0.03 |      |
| Evapotranspiration upper soil    |                  |                    |                              |                 |           |                |                    |                       |                 |                       |                         |                |                |                  |                |               |                       |           |                                |                          |                    |                      |             |                         |                         |           |               |                        |                      |                     |                      |                |                |                |                 |                 |                            |                     |                         |      | 8    | 0.10 |      |
| Evapotranspiration deeper soil   |                  |                    |                              |                 |           |                |                    |                       |                 |                       |                         |                |                |                  |                |               |                       |           |                                |                          |                    |                      |             |                         |                         |           |               |                        |                      |                     |                      |                |                |                |                 |                 |                            |                     |                         |      | 0    | 0.00 |      |
| Upper soil water content         |                  |                    |                              |                 |           |                |                    |                       |                 |                       |                         |                |                |                  |                |               |                       |           |                                |                          |                    |                      |             |                         |                         |           |               |                        |                      |                     |                      |                |                |                |                 |                 |                            |                     |                         |      | 1    | 0.01 |      |
| Deeper soil water content        |                  |                    |                              |                 |           |                |                    |                       |                 |                       |                         |                |                |                  |                |               |                       |           |                                |                          |                    |                      |             |                         |                         |           |               |                        |                      |                     |                      |                |                |                |                 |                 |                            |                     |                         |      | 4    | 0.03 |      |
| Inorganic soil carbon            |                  |                    |                              |                 |           |                |                    |                       |                 |                       |                         |                |                |                  |                | FD            |                       |           |                                |                          |                    |                      |             |                         |                         |           |               |                        |                      |                     |                      |                |                |                |                 |                 |                            |                     |                         |      | 3    | 0.01 |      |
| Organic soil carbon              |                  |                    |                              |                 |           |                |                    |                       |                 |                       |                         |                |                |                  |                |               |                       |           |                                |                          |                    |                      |             |                         |                         |           |               |                        |                      |                     |                      |                |                |                |                 |                 |                            |                     |                         |      | 1    | 0.00 |      |
| Bulk density soil                |                  |                    |                              |                 |           |                |                    |                       |                 |                       |                         |                |                |                  |                |               |                       |           |                                |                          |                    |                      |             |                         |                         |           |               |                        |                      |                     |                      |                |                |                |                 |                 |                            |                     |                         |      | 2    | 0.03 |      |
| Nitrogen content soil            |                  |                    |                              |                 |           |                |                    |                       |                 |                       |                         |                |                |                  |                | FD            |                       |           |                                |                          |                    |                      |             |                         |                         |           |               |                        |                      |                     |                      |                |                |                |                 |                 |                            |                     |                         |      | 4    | 0.06 |      |
| Soil 15N                         |                  |                    |                              |                 |           |                |                    |                       |                 |                       |                         |                |                |                  |                |               |                       |           |                                |                          |                    |                      |             |                         |                         |           |               |                        |                      |                     |                      |                |                |                |                 |                 |                            |                     |                         |      | 3    | 0.07 |      |
| Soil NH4                         |                  |                    |                              |                 |           |                |                    |                       |                 |                       |                         |                |                |                  |                |               |                       |           |                                |                          |                    |                      |             |                         |                         |           |               |                        |                      |                     |                      |                |                |                |                 |                 |                            |                     |                         |      | 4    | 0.03 |      |
| Soil NO3                         |                  |                    |                              |                 |           |                |                    |                       |                 |                       |                         |                |                |                  |                |               |                       |           |                                |                          |                    |                      |             |                         |                         |           |               |                        |                      |                     |                      |                |                |                |                 |                 |                            |                     |                         |      | 7    | 0.08 |      |
| Nitrate leaching                 |                  |                    |                              |                 |           |                |                    |                       |                 |                       |                         |                |                |                  |                |               |                       |           |                                |                          |                    |                      |             |                         |                         |           |               |                        |                      |                     |                      |                |                |                |                 |                 |                            |                     |                         |      |      | 5    | 0.16 |
| Phosphorous content soil         |                  |                    |                              |                 |           |                |                    |                       |                 |                       |                         |                |                |                  |                |               | FD                    |           |                                |                          |                    |                      |             |                         |                         |           |               |                        |                      |                     |                      |                |                |                |                 |                 |                            |                     |                         |      |      | 2    | 0.07 |

992

993

994

995 **S3 EXTENDED REFERENCES**

- 996 44. Loranger, H., Weisser, W. W., Ebeling, A., Eggers, T., De Luca, E., Loranger, J.,  
997 Roscher, C. & Meyer, S. T. (2014). Invertebrate herbivory increases along an  
998 experimental gradient of grassland plant diversity. *Oecologia* 174, 183-193.
- 999 45. Meyer, S. T., Scheithe, L., Hertzog, L., Ebeling, A., Wagg, C., Roscher, C. & Weisser,  
1000 W. W. (2017). Consistent increase in herbivory along two experimental plant diversity  
1001 gradients over multiple years. *Ecosphere* 8, e01876.
- 1002 46. Ebeling, A., Klein, A.-M., Schumacher, J., Weisser, W. W. & Tschardtke, T. (2008). Hoe  
1003 does plant species richness affect pollinator richness and temporal stability of flower  
1004 visits? *Oikos* 117, 1808-1815.
- 1005 47. Hudewenz, A., Klein, A.-M., Scherber, C., Stanke, L., Tschardtke, T., Vogel, A.,  
1006 Weigelt, A., Weisser, W. W. & Ebeling, A. (2012). Herbivore and pollinator responses to  
1007 grassland management intensity along experimental changes in plant species richness.  
1008 *Biological Conservation*.
- 1009 48. Scherber, C., Eisenhauer, N., Weisser, W. W., Schmid, B., Voigt, W. *et al.* (2010).  
1010 Bottom-up effects of plant diversity on multitrophic interactions in a biodiversity  
1011 experiment. *Nature* 468, 553-556.
- 1012 49. Ebeling, A., Hines, J., Hertzog, L. R., Lange, M., Meyer, S. T., Simons, N. K. & Weisser,  
1013 W. W. (2018). Plant diversity effects on arthropods and arthropod-dependent ecosystem  
1014 functions in a biodiversity experiment. *Basic and Applied Ecology* 26, 50-63.
- 1015 50. Vogel, A., Eisenhauer, N., Weigelt, A. & Scherer-Lorenzen, M. (2013). Plant diversity  
1016 does not buffer drought effects on litter decomposition and microbial processes. *Global*  
1017 *Change Biology* 19, 2795-2803.

- 1018 51. Vogel, A., Scherer-Lorenzen, M. & Weigelt, A. (2012). Grassland resistance and  
1019 resilience after drought depends on management intensity and species richness. *Plos One*  
1020 7, e36992.
- 1021 52. Ruijven, J. & Berendse, F. (2010). Diversity enhances community recovery, but not  
1022 resistance, after drought. *Journal of Ecology* 98, 81-86.
- 1023 53. Roscher, C., Fergus, A. J. F., Petermann, J. S., Buchmann, N., Schmid, B., Schulze, E.-D.  
1024 (2013). What happens to the sown species if a biodiversity experiment is not weeded?  
1025 *Basic and Applied Ecology* 14, 187-198.
- 1026 54. Scheu, S. (1992). Automated measurement of the respiratory response of soil  
1027 microcompartments: active microbial biomass in earthworm faeces. *Soil Biology and*  
1028 *Biochemistry* 24, 1113–1118.
- 1029 55. Anderson, J. & Domsch, K. (1978). A physiological method for the quantitative  
1030 measurement of microbial biomass in soils. *Soil Biology and Biochemistry* 10, 215–221.
- 1031 56. Beck, T., Joergensen, R. G., Kandeler, E., Makeschin, F., Nuss, E., Oberholzer, H. R. &  
1032 Scheu, S. (1997). An inter-laboratory comparison of ten different ways of measuring soil  
1033 microbial biomass C. *Soil Biology and Biochemistry* 29, 1023–1032.
- 1034 57. Strecker, T., González Macé, O., Scheu, S. & Eisenhauer, N. (2016). Functional  
1035 composition of plant communities determines the spatial and temporal stability of soil  
1036 microbial properties in a long-term plant diversity experiment. *Oikos* 125, 1743-1754.
- 1037 58. Eisenhauer, N., Milcu, A., Sabais, A. C. W., Bessler, H., Weigelt, A., Engels, C. &  
1038 Scheu, S. (2009). Plant community impacts on the structure of earthworm communities  
1039 depend on season and change with time. *Soil Biology and Biochemistry* 41, 2430-2443.
- 1040 59. Thielemann, U. (1986). The octet-method for sampling earthworm populations.

- 1041 *Pedobiologia* 29, 296–302.
- 1042 60. Kempson, D., Lloyd, M., Ghelardij, R. (1963). A new extractor for woodland litter.
- 1043 *Pedobiologia* 3, 1-21.
- 1044 61. Heimer, S. & Nentwig, W. (1991). *Spinnen Mitteleuropas. Ein Bestimmungsbuch*. Paul
- 1045 Parey, Berlin and Hamburg, Germany.
- 1046 62. Bährmann, R. (1995). *Bestimmung wirbelloser Tiere: Bildtafeln für zoologische*
- 1047 *Bestimmungsübungen und Exkursionen*. Fischer Verlag Jena, Germany.
- 1048 63. Schaefer, M. (2000). *Brohmer – Fauna von Deutschland* (21<sup>th</sup> edn.). Wiebelsheim,
- 1049 Germany: Quelle & Meyer.
- 1050 64. Eisenhauer, N., Milcu, A., Sabais, A. C. W., Bessler, H., Brenner, J., Engels, C., Klarner,
- 1051 B., Maraun, M., Partsch, S., Roscher, C., Schonert, F., Temperton, V., Thomisch, K.,
- 1052 Weigelt, A., Weisser, W. W. & Scheu, S. (2011). Plant diversity surpasses plant
- 1053 functional groups and plant productivity as driver of soil biota in the long term. *PLoS*
- 1054 *ONE* 6, e16055.
- 1055 65. Fjellberg, A. (1980). *Identification keys to Norwegian Collembola*. Norsk Entomologisk
- 1056 Forening, Ås.
- 1057 66. Hopkin, S. P. (1997). *Biology of the Springtails: Collembola (Insecta)*. Oxford University
- 1058 Press, Oxford, UK.
- 1059 67. Hopkin, S. P. (2007). *A key to the springtails (Collembola) of Britain and Ireland*. Field
- 1060 Studies Council (AIDGAP Project).
- 1061 68. Kreuziger, Y. (2006). *Rückkopplungseffekte verschieden diverser Grünlandökosysteme*
- 1062 *auf die Komponenten des Bodenwasserhaushalts an einem Auestandort der Saale*.
- 1063 Dissertation. Friedrich Schiller University Jena: Jena, Germany.

- 1064 69. Fischer, C., Leimer, S., Roscher, C., Ravenek, J., de Kroon, H., Kreutziger, Y., Baade, J.,  
1065 Beßler, H., Eisenhauer, N., Weigelt, A., Mommer, L., Lange, M., Gleixner, G., Wilcke,  
1066 W., Schröder, B. & Hildebrandt, A. (2019). Plant species richness and functional groups  
1067 have different effects on soil water content in a decade-long grassland experiment.  
1068 *Journal of Ecology* 107, 127–141.
- 1069 70. Leimer, S., Kreutziger, Y., Rosenkranz, S., Beßler, H., Engels, C., Hildebrandt, A.,  
1070 Oelmann, Y., Weisser, W. W., Wirth, C. & Wilcke, W. (2014). Plant diversity effects on  
1071 the water balance of an experimental grassland. *Ecohydrology* 7, 1378–1391.
- 1072 71. Steinbeiss, S., Beßler, H., Engels, C., Temperton, V. S., Buchmann, N., Roscher, C.,  
1073 Kreutziger, Y., Baade, J., Habekost, M. & Gleixner, G. (2008). Plant diversity positively  
1074 affects short-term soil carbon storage in experimental grasslands. *Global Change Biology*  
1075 14, 2937-2949.
- 1076 72. Lange, M., Eisenhauer, N., Sierra, C. A., Bessler, H., Engels, C., Griffiths, R. I., Mellado-  
1077 Vázquez, P. G., Malik, A. A., Roy, J., Scheu, S., Steinbeiss, S., Thomson, B. C.,  
1078 Trumbore, S. E. & Gleixner, G. (2015). Plant diversity increases soil microbial activity  
1079 and soil carbon storage. *Nature Communications* 6, 6707.
- 1080 73. Mulvaney, P. (1996). Surface plasmon spectroscopy of nanosized metal particles.  
1081 *Langmuir* 12, 788-800.
- 1082 74. Roscher, C., Schumacher, J., Lipowsky, A., Gubsch, M., Weigelt, A., Pompe, S., Kolle, O.,  
1083 Buchmann, N., Schmid, B. & Schulze E.-D. (2013). A functional trait-based approach to  
1084 understand community assembly and diversity–productivity relationships over 7 years in  
1085 experimental grasslands. *Perspectives in Plant Ecology, Evolution and Systematics* 15, 139-149.
- 1086 75. Allan, E., Weisser, W. W., Weigelt, A., Roscher, C., Fischer, M. & Hillebrand, H. (2011). More  
1087 diverse plant communities have higher functioning over time due to turnover in complementary

1088 dominant species. *Proceedings of the National Sciences of the United States of America* 108,  
1089 17034-17039.  
1090
